# Supplementary material for: Xylosyl Extension of O-Glucose Glycans on the Extracellular Domain of NOTCH1 and NOTCH2 Regulates Notch Cell Surface Trafficking
Source: Cells. 2020 May 14;9(5):1220. doi: 10.3390/cells9051220 (PMC7291291; doi:10.3390/cells9051220)
Supplement: Supplementary file 1 [file cells-09-01220-s001.pdf]

# Supplementary Materials

## Xylosyl-extension of *O*-glucose glycans on the extracellular domain of NOTCH1 and NOTCH2 regulates Notch cell surface trafficking

Yusuke Urata <sup>1,2</sup>, Wataru Saiki <sup>1</sup>, Yohei Tsukamoto <sup>1</sup>, Hiroaki Sago <sup>1</sup>, Hideharu Hibi <sup>2</sup>, Tetsuya Okajima <sup>1,\*</sup>, and Hideyuki Takeuchi <sup>1,\*</sup>

### Figures

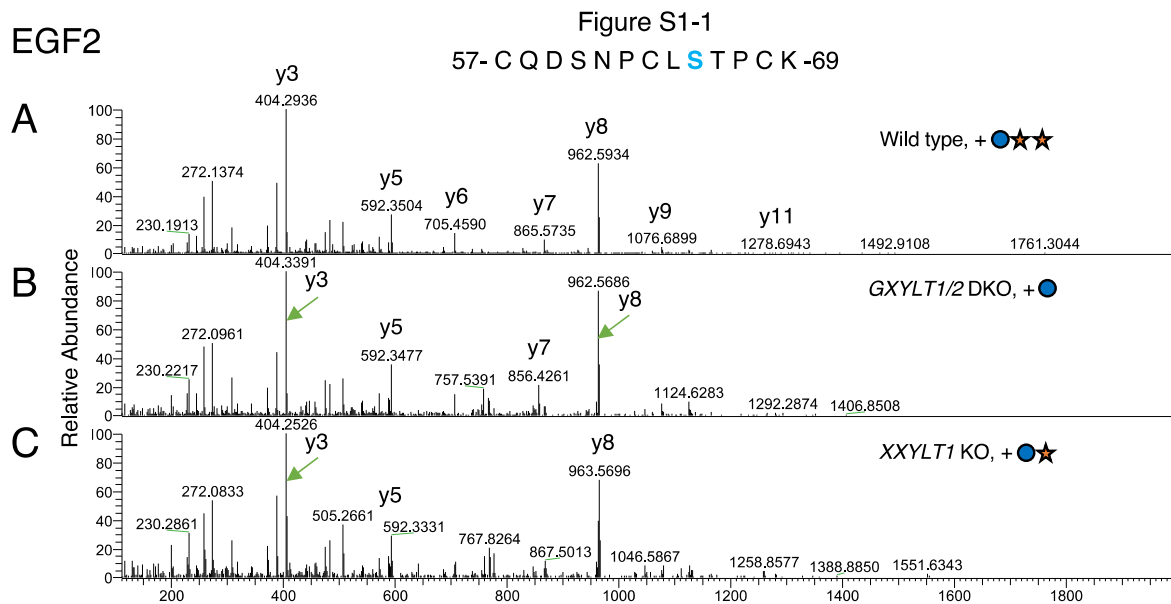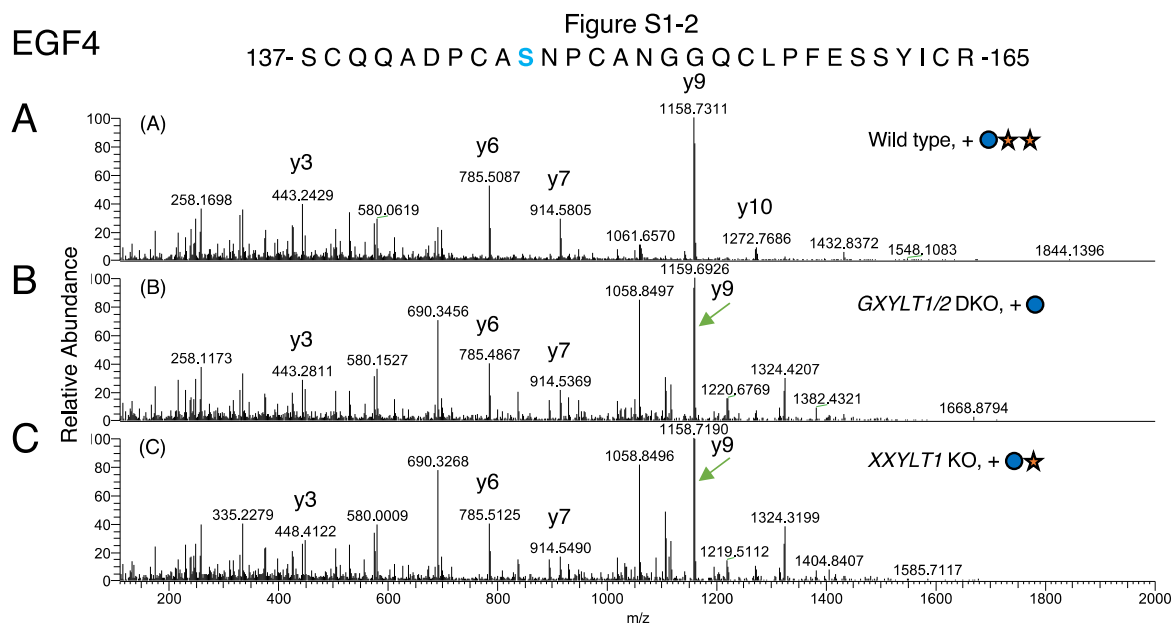

# EGF9

Figure S1-3  
328-TGEDCSENIDDCA**S**AACF-345

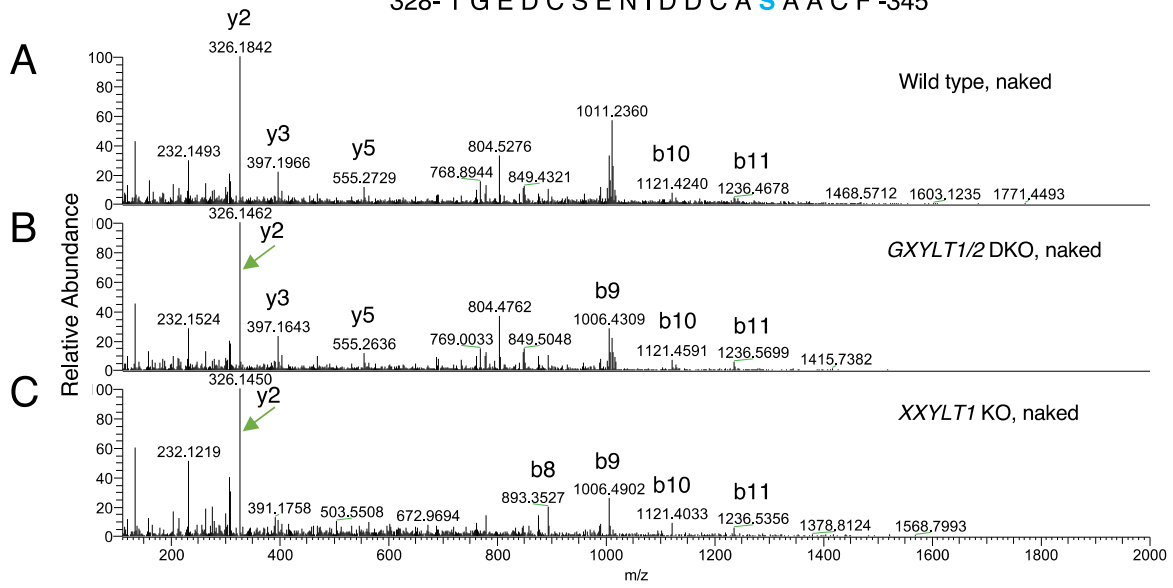

# EGF10

Figure S1-4  
366-TGLLCHLNDA**C**INPCNEGSNCDTNPVNGK-395

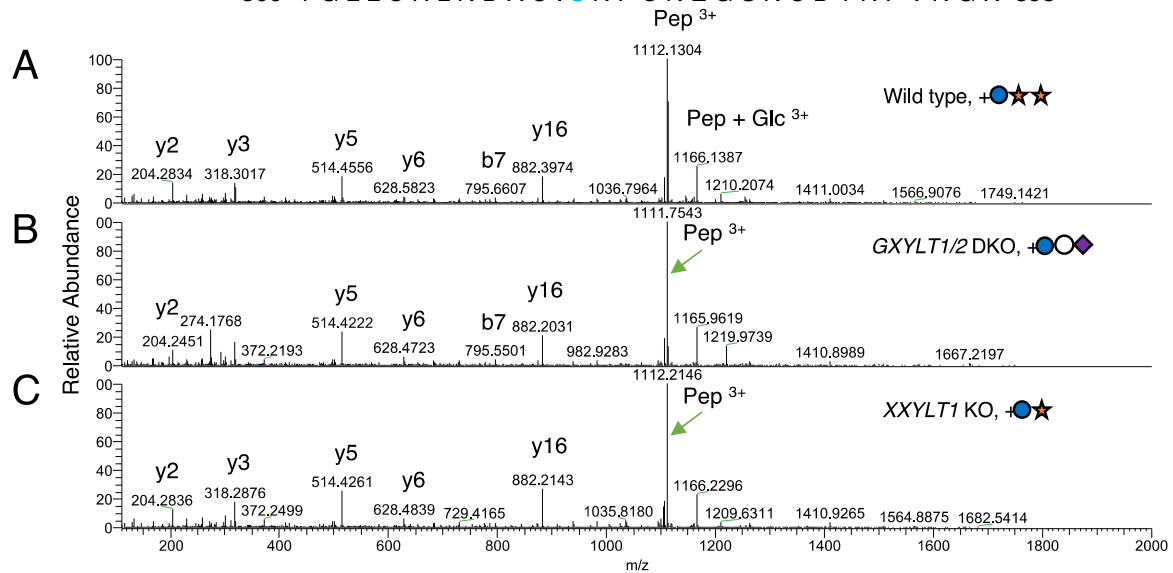

EGF12

Figure S1-5

445-TGPRCEIDVNECI**S**NPCQNDATCLDQIGEF-474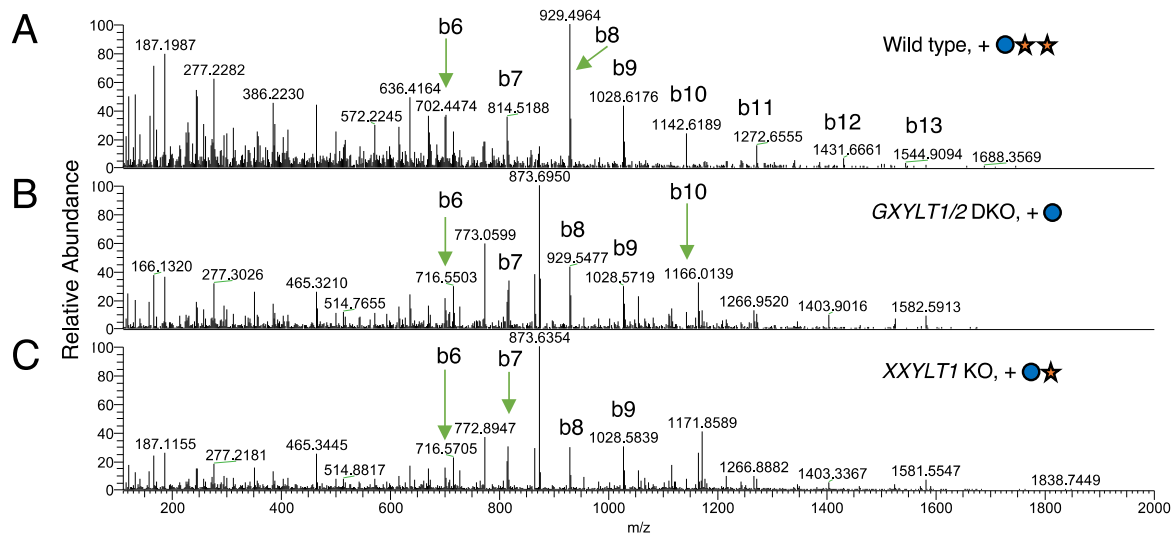

Figure S1-6

EGF13

487-CEINTDECA**S**SPCLHNGHCMDEKNEF-512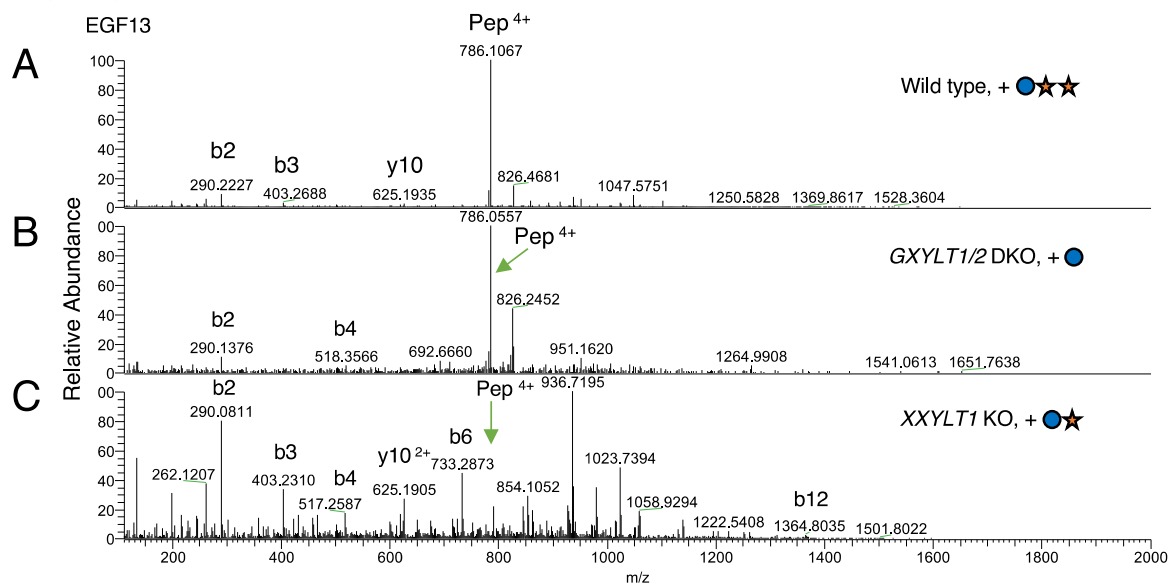

EGF14

Figure S1-7

519- G F N G H L C Q Y D V D S T P C K -538

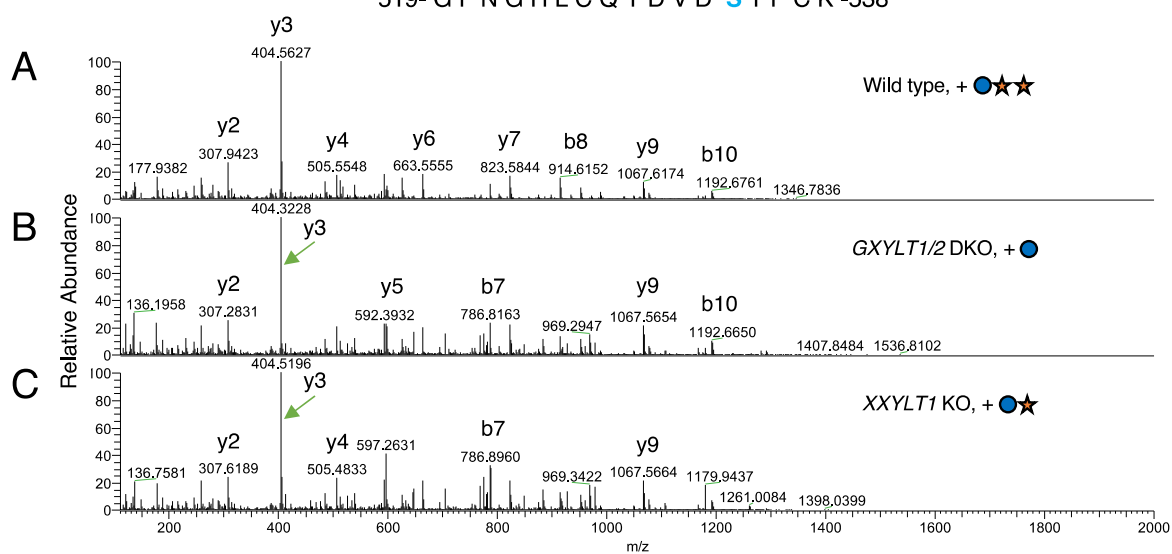

EGF16

Figure S1-8

582- D G V A T F T C L C Q P G Y T G H H C E T N I N E C H S Q P C R -613

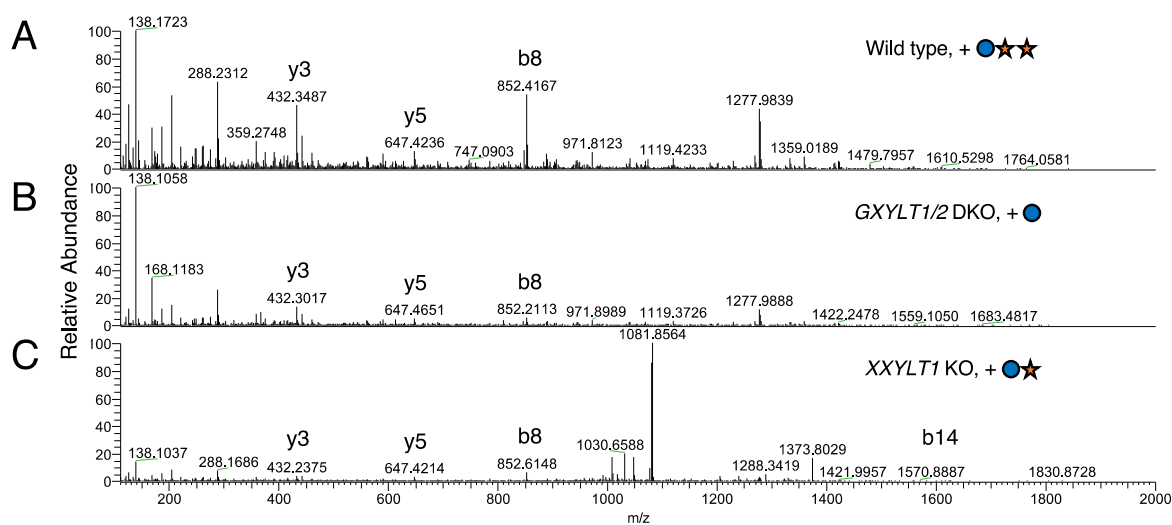

EGF17

Figure S1-9

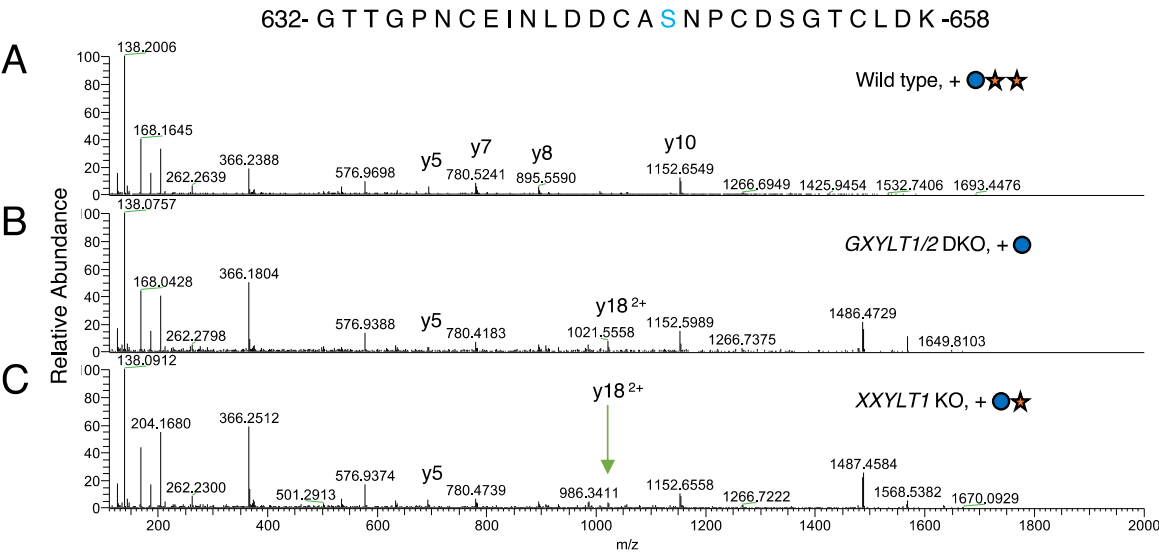

EGF19

Figure S1-10

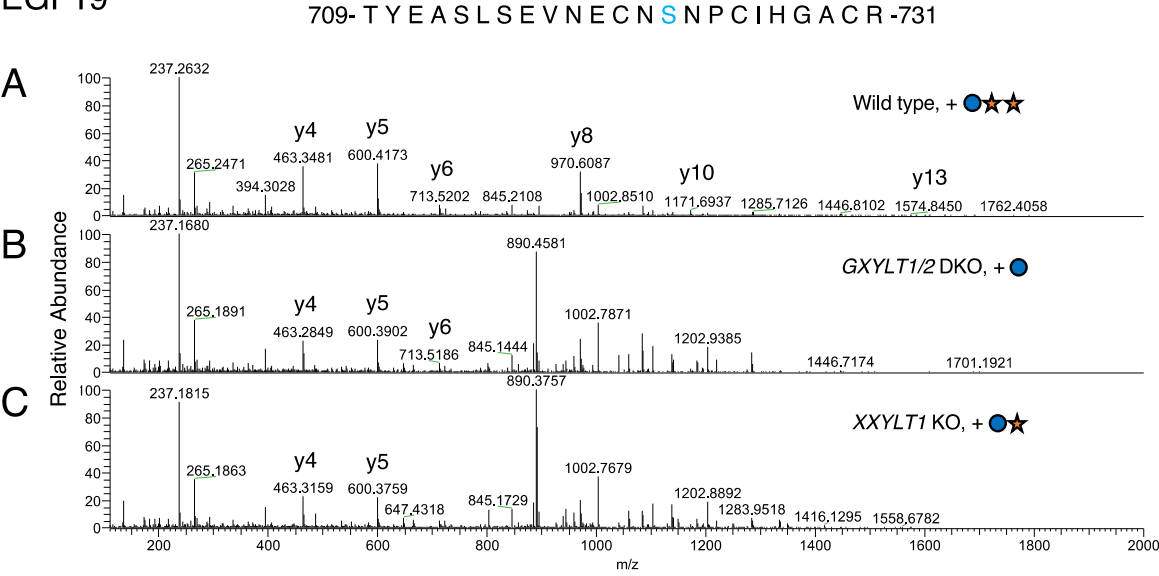

## EGF20

Figure S1-11

739-CDCA PGW SGTNCDINNECE **S**NPCVNGGTCK-769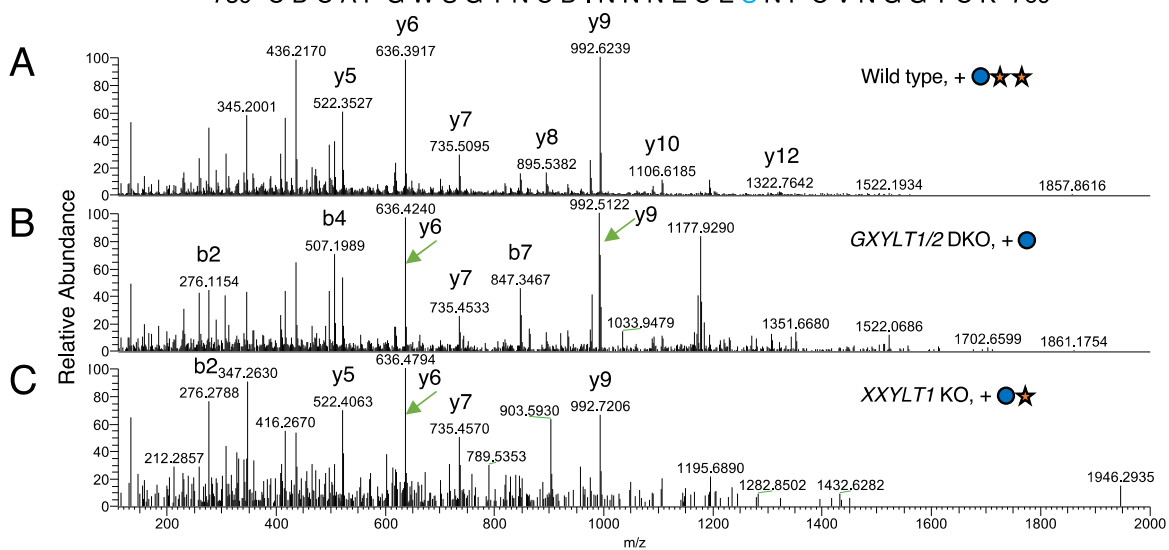

## EGF21

Figure S1-12

781-EGFSGPNCQTNINECA **S**NPCLNQGTCI **D**DVAGYK-814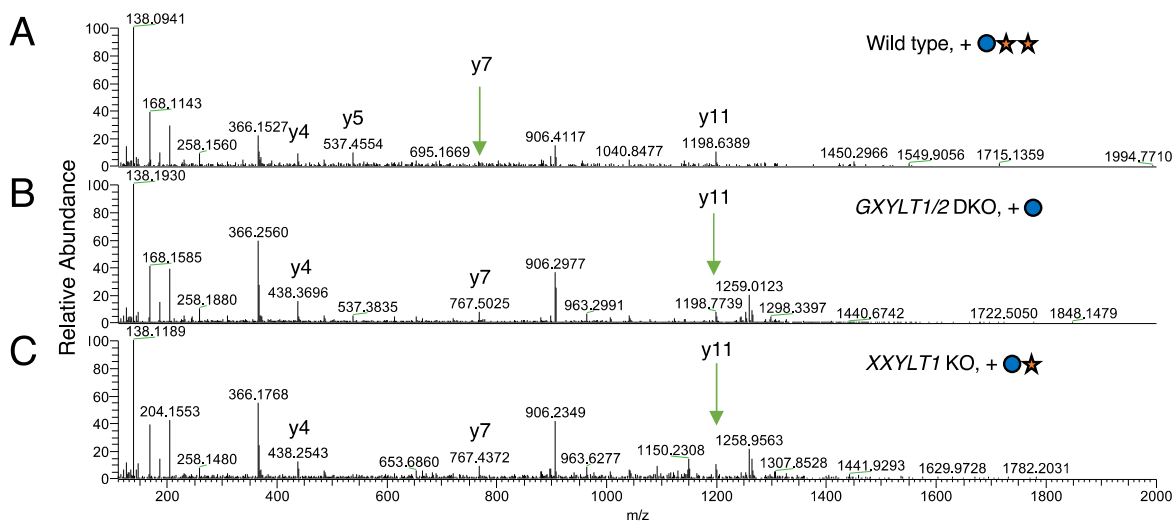

EGF25

Figure S1-13

942-CEEDINECA**S**NPCQNGANCTDCVDSY-967

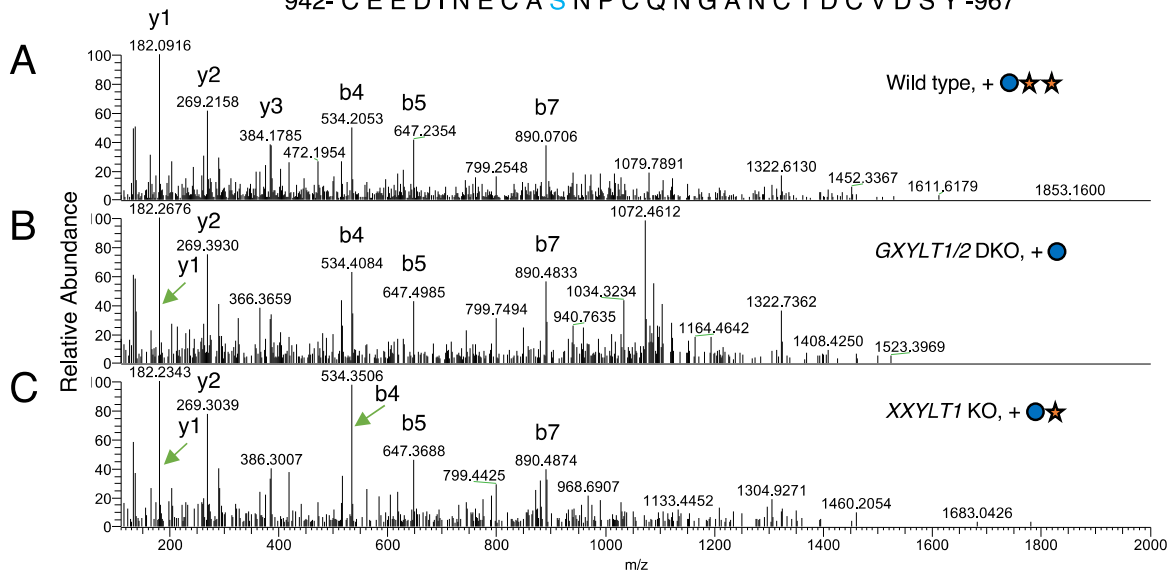

EGF27

Figure S1-14

1021-DVNECD**S**RPCLHGGTCQDSY-1040

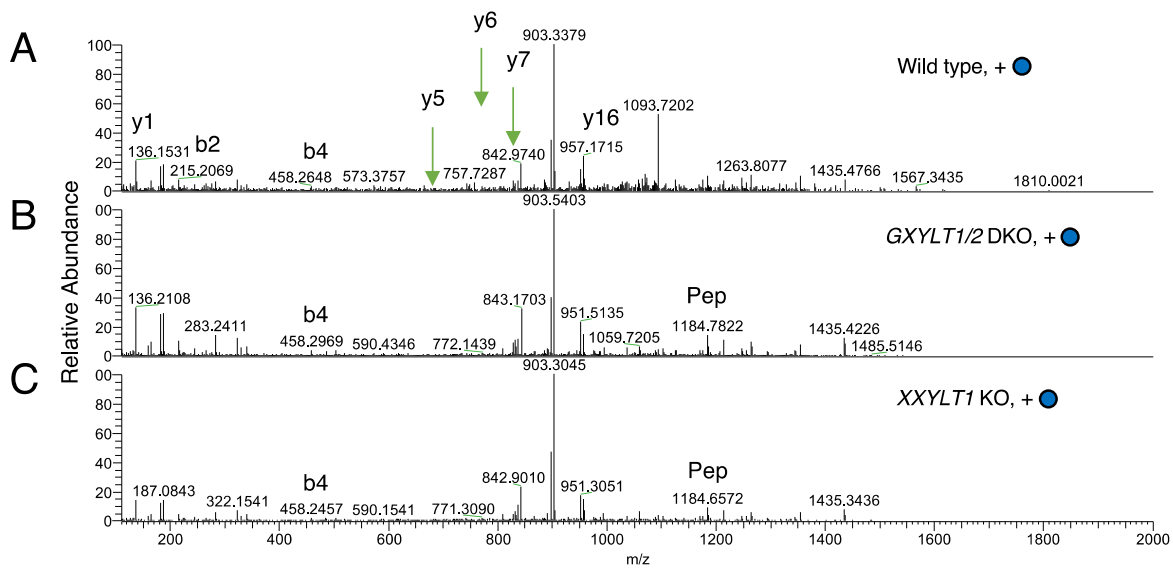

# EGF28

Figure S1-15  
1062- W C D S A P C K -1069

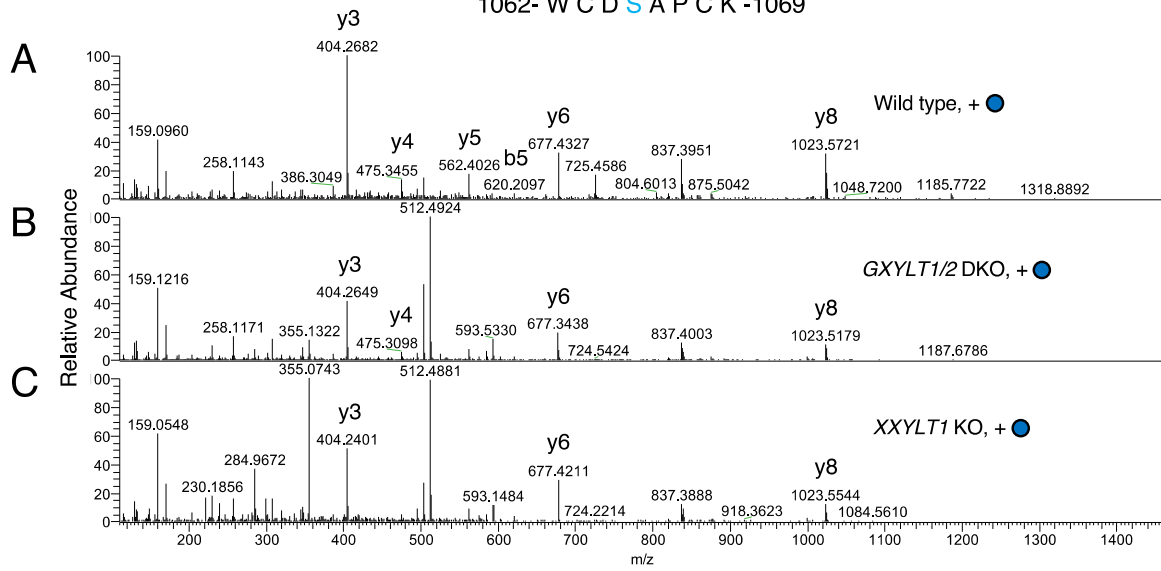

# EGF31

Figure S1-16  
1176- H G S N C S E E I N E C L S Q P C Q N G G T C I D L T N S Y -1205

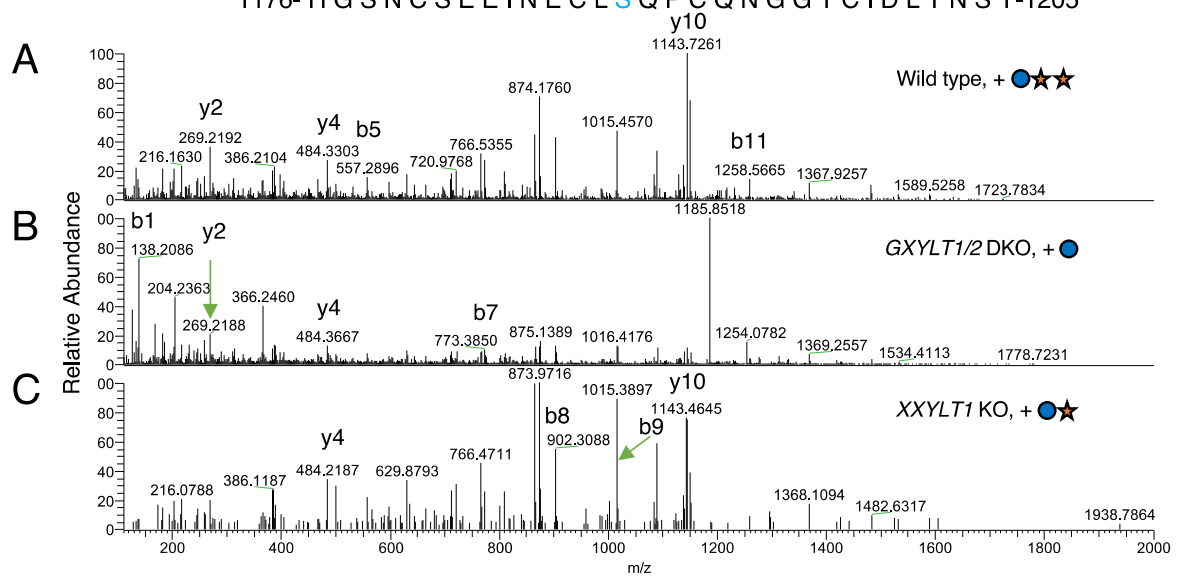

EGF33

Figure S2117

1264- C E G D V N E C L S N P C D P R -1279

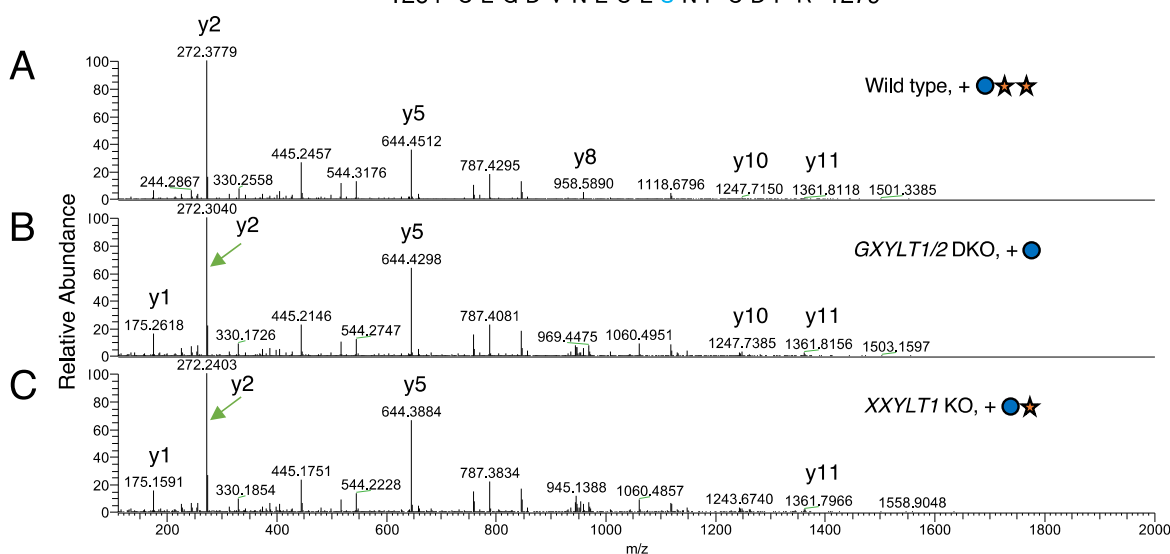

**Figure S1. MS/MS spectra of (glyco)peptides from NOTCH1.** MS/MS spectra of (glyco)peptide from NOTCH1. Samples were generated in wild type control HEK293T cells (A), *GXYLT1/2* DKO cells (B), *XXYLT1* KO cells (C) transfected with the plasmids encoding mouse NOTCH1 ECDs as described in Materials and Methods. The data in Figure S1-1 through S1-9 are derived from the analysis of mouse NOTCH1 EGF1-18. The data in Figure S1-10 through S1-12, S1-15 through S1-17 are derived from the analysis of mouse NOTCH1 EGF19-36. The data in Figure S1-13, and S1-14 are derived from the analysis of mouse NOTCH1 EGF24-28. MS/MS spectra confirmed the identity of (glyco)peptides based on the presence of peptide specific b- and y- ions and neutral loss of predicted glycans. Amino acid sequences are shown with the identified fragment ions at the upper right corner. For each EGF repeat from NOTCH1, MS/MS spectra of glycopeptides modified with the major glycoform derived from each cell clone are shown. The sequence of peptides, the predicted and measured m/z, and the charge state are summarized in Table S1.

EGF4  
141-QCQWTDACL**S**HPCENGSTCTSVASQFSCK-169

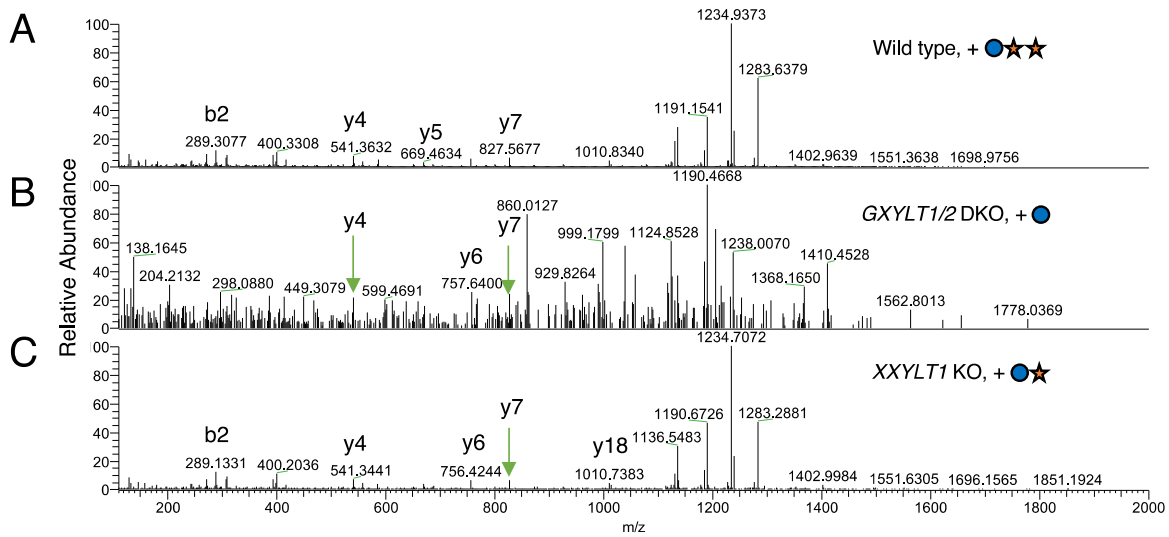

EGF10  
369-A G L L C H L D D A C I **S** N P C H K -386

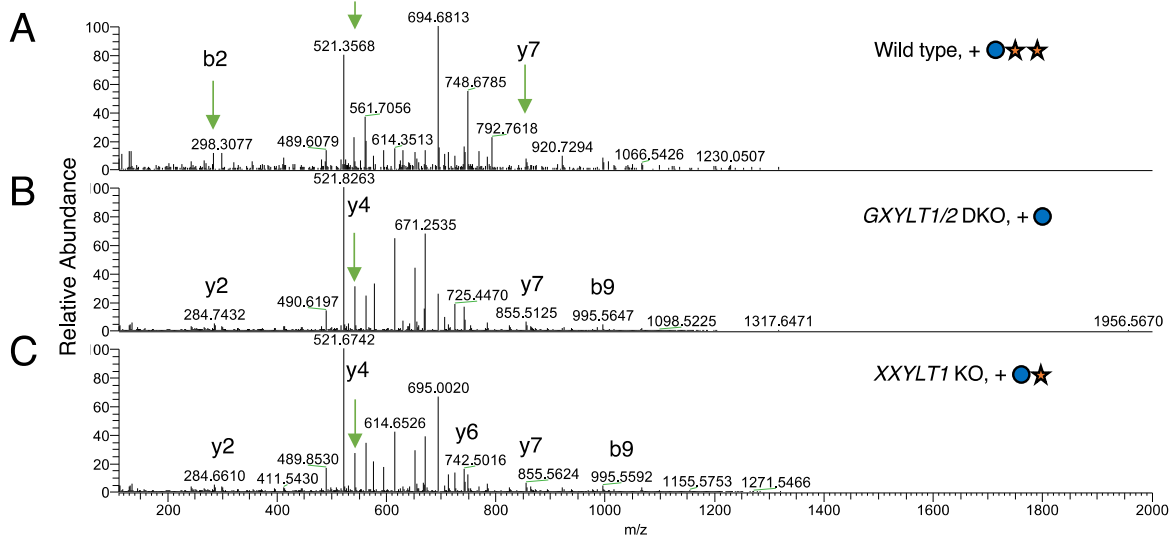

EGF12

Figure S2-3

453-CEMDINECHSDPCQNDATCLDK-474

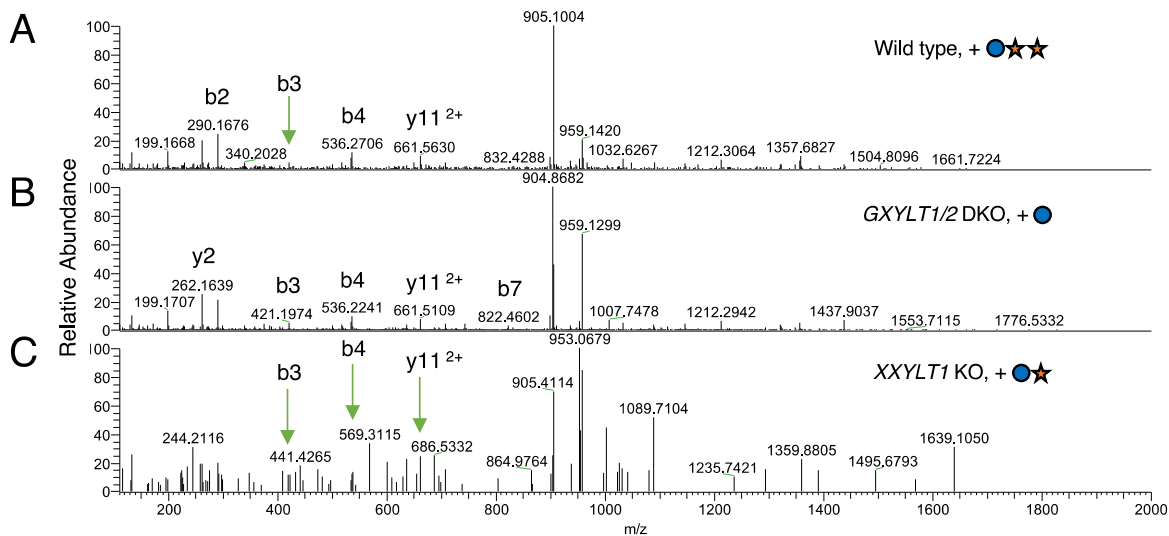

EGF13

Figure S2-4

488-GVHCELEVNECQSNPCVNNGQCVDK-512

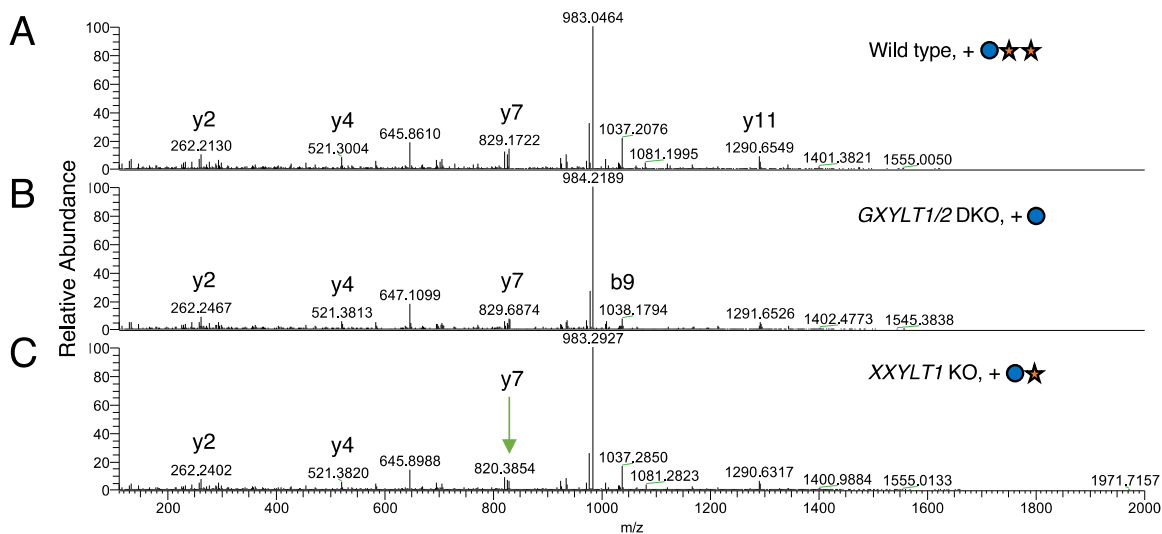

EGF14

Figure S2-5

516-FQCLCPPGFTGPVCQIDIDDCS**S**TPCLNGAK-546

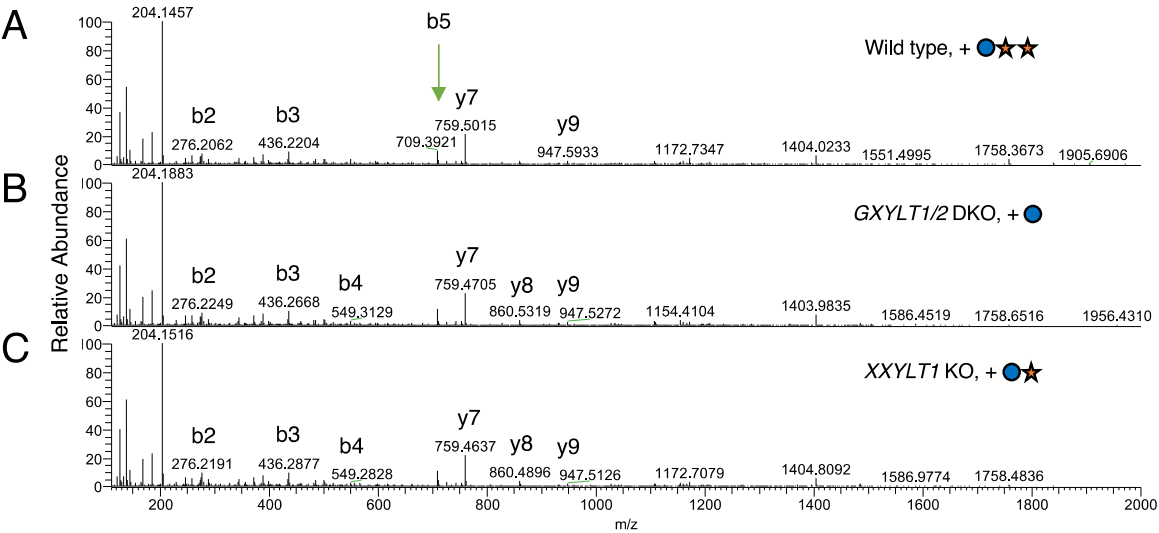

EGF16

Figure 2-6

611-CY**S**SPCLND-619

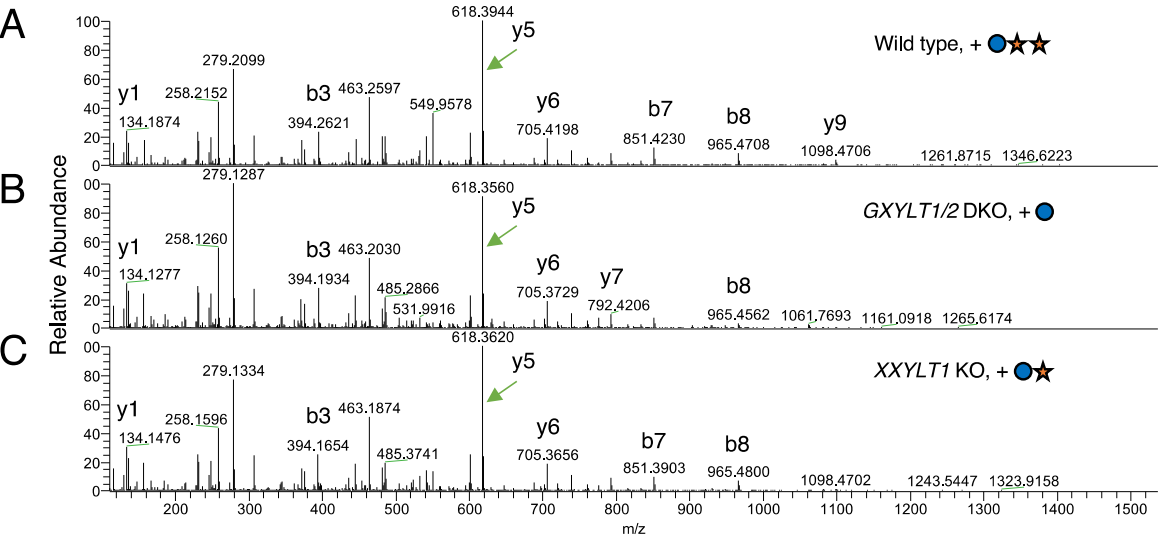

EGF18

Figure S2-7  
679- C N I D I D E C A S N P C R -692

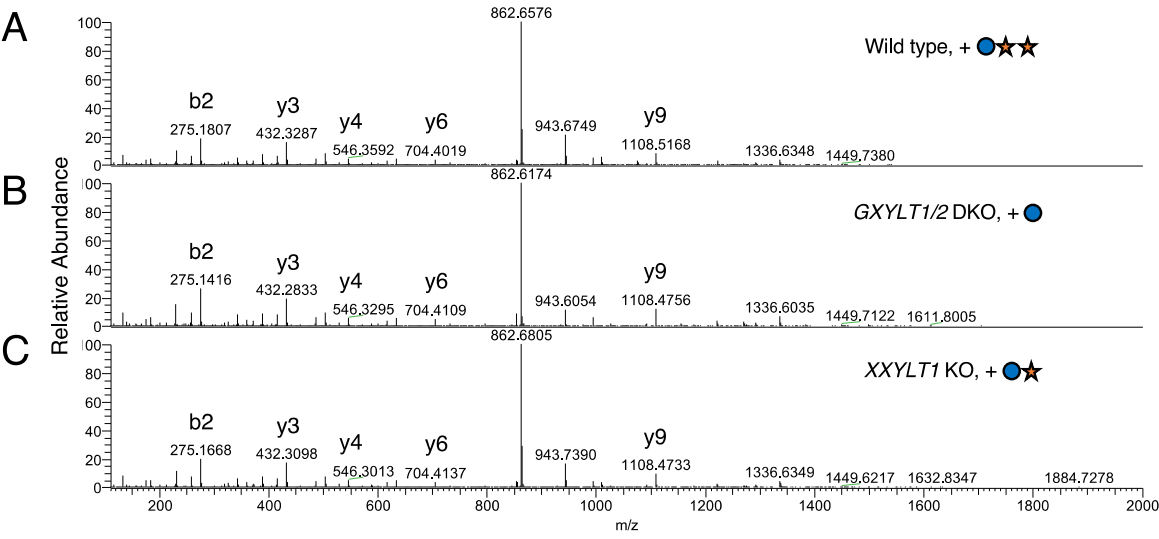

EGF19

Figure S2-8  
706- C I C P E G P H H P S C Y S Q V N E C L S N P C I H G N C T G G L S G Y K -742

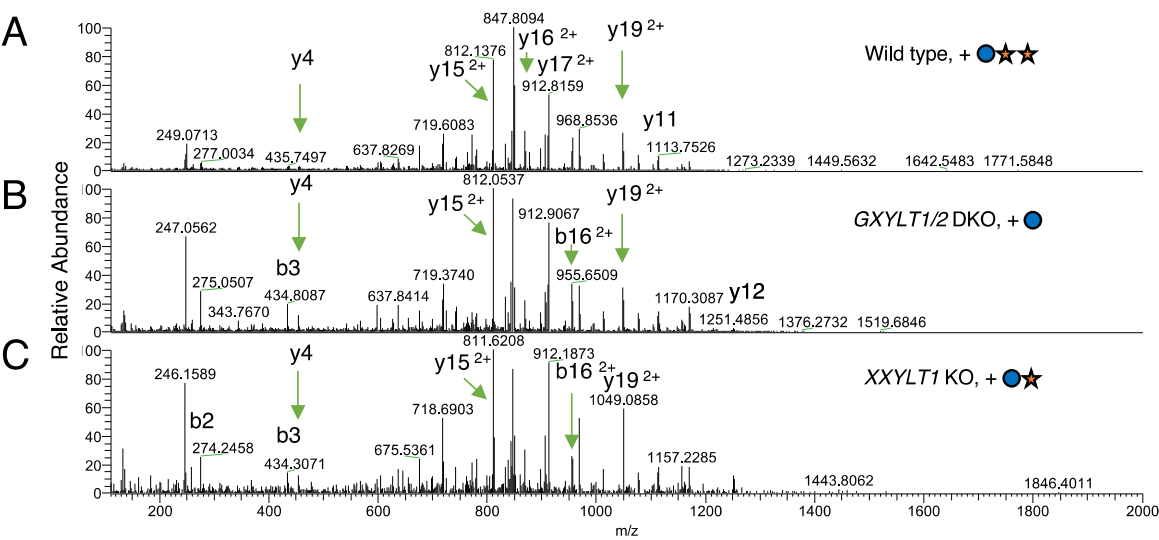

EGF20

Figure S2-9  
759-NECLSNPCQNGGTCNNLVNGYR-780

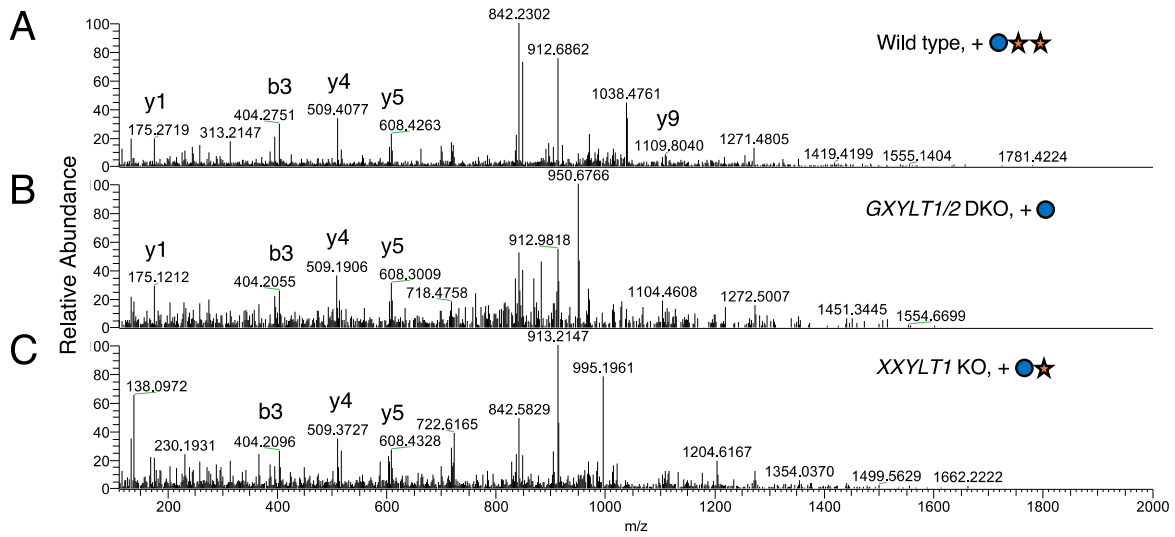

EGF21

Figure S2-10

789-GYNCQVNIDECA SNPCLNQGTCFDDVSGYTCHCMLPYTGK-828

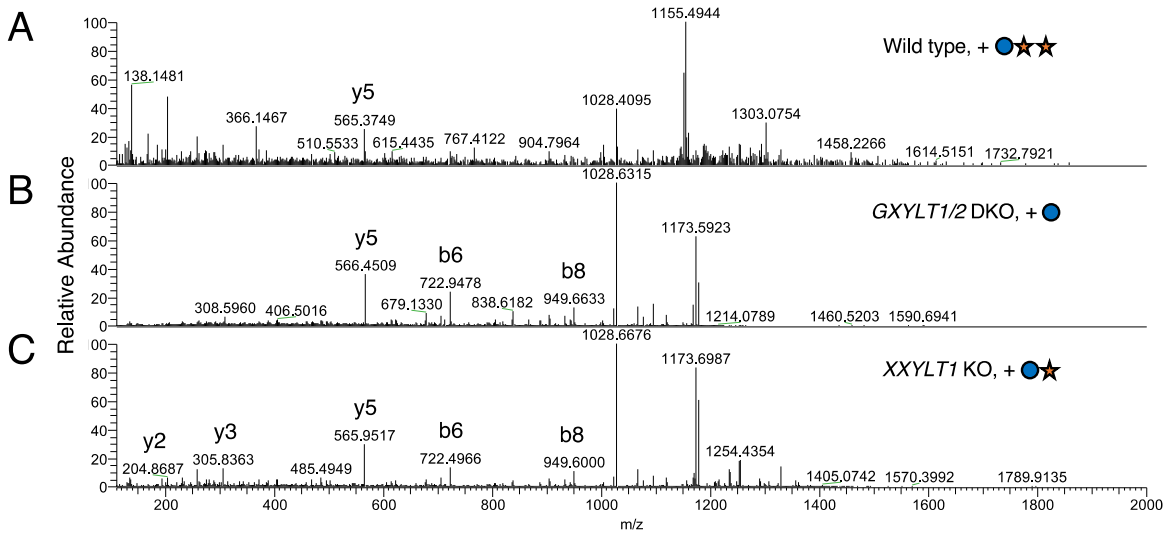

EGF23

Figure S2-11

870-CTVDVDECI S K-880

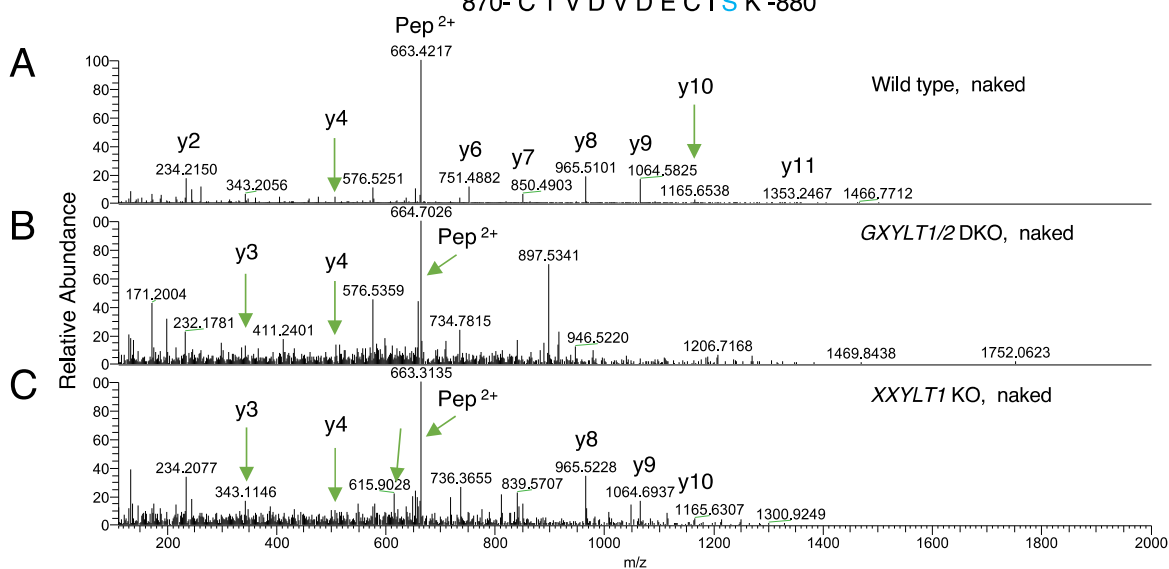

EGF25

Figure S2-12

946-CQTDMECL S E PCK-959

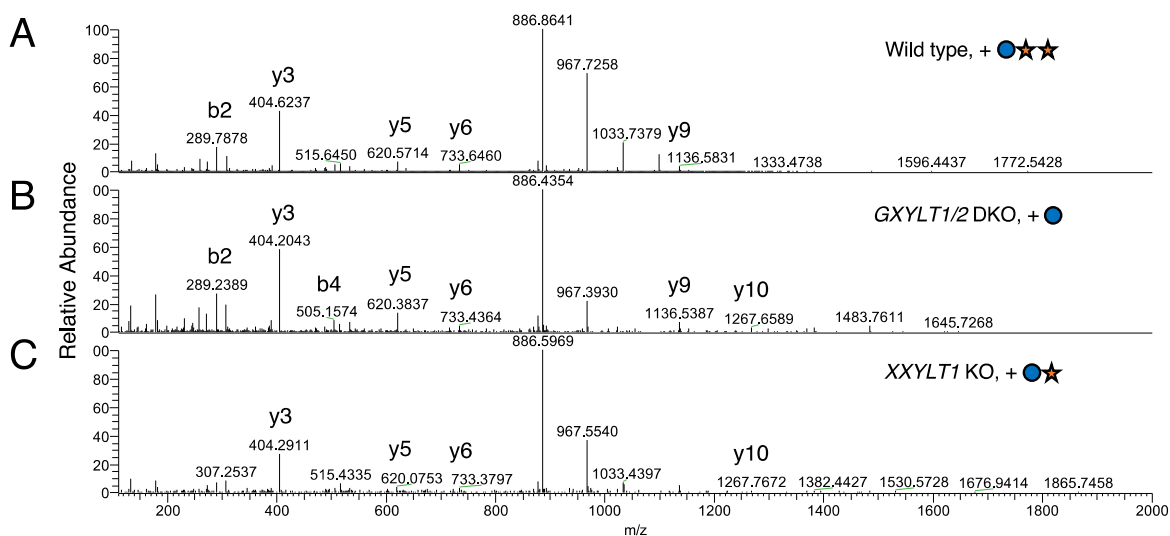

## EGF27

Figure S2-13

1022-CLHDINECS**S**NPCLNAGTCVDGLGTYH-1047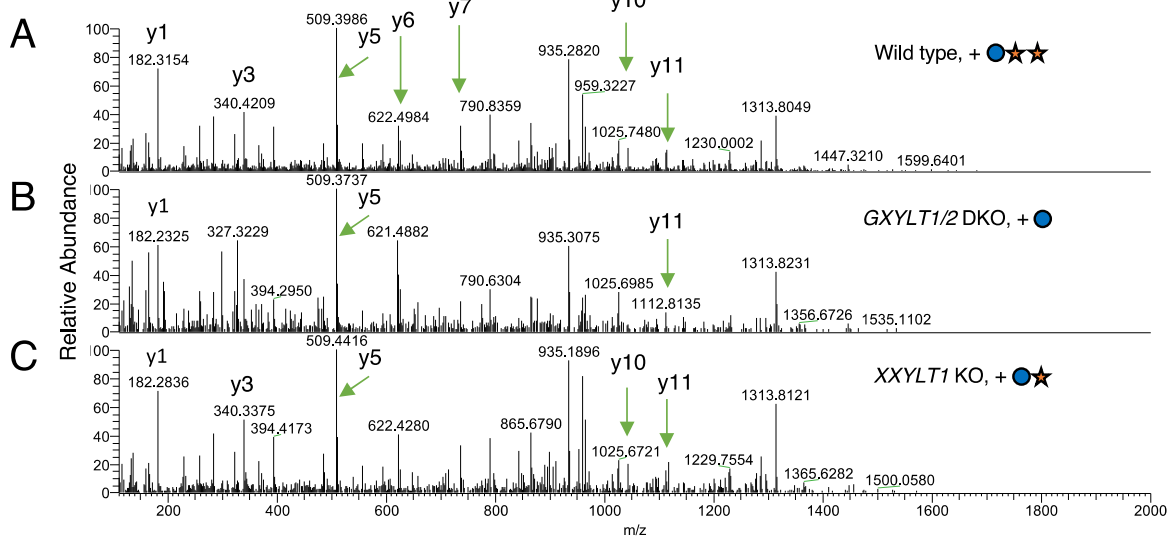

## EGF30

Figure S2-14

1153-CA**S**NP**C**QH**G**ATC**N**D**F**I**G**G**Y**R**C**E-1174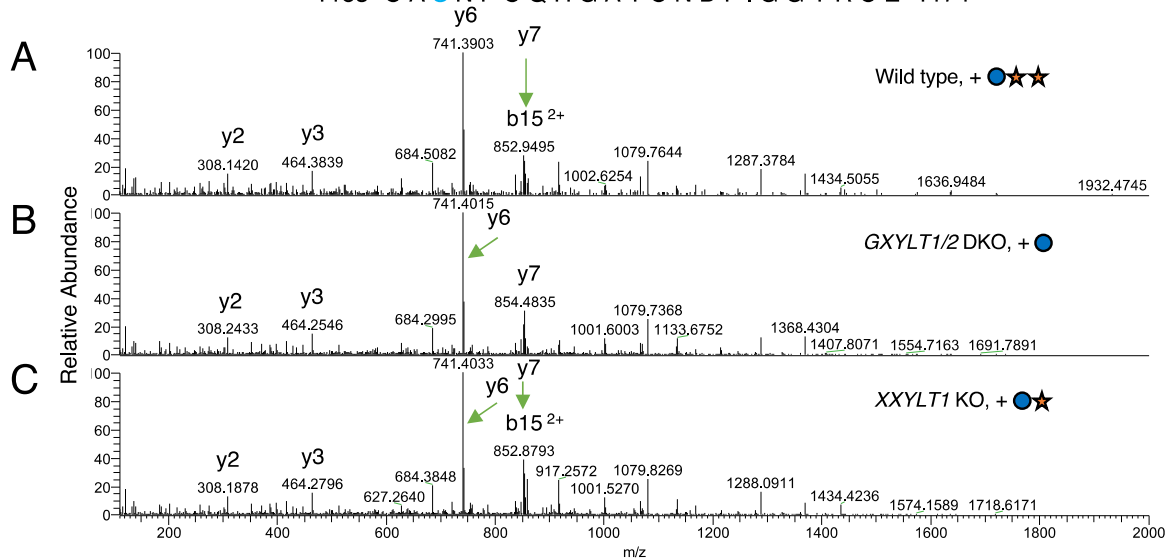

EGF33

Figure S2-15

1261-CEGDINECLSNPCSSSEGLDCVQLK-1285

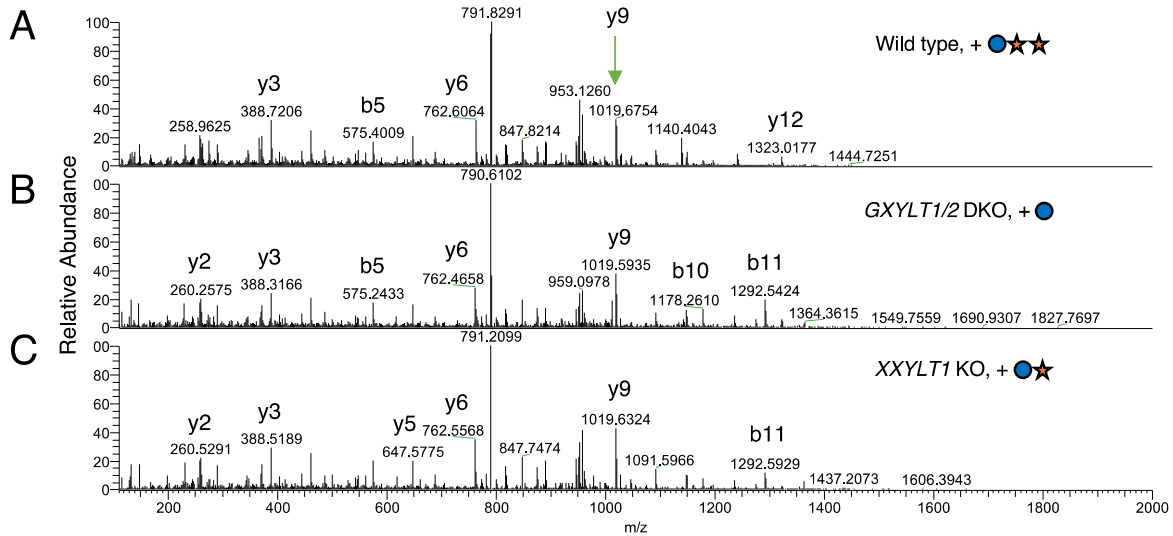

EGF36

Figure S2-16

57-CQDSNPCLSTPCK-69

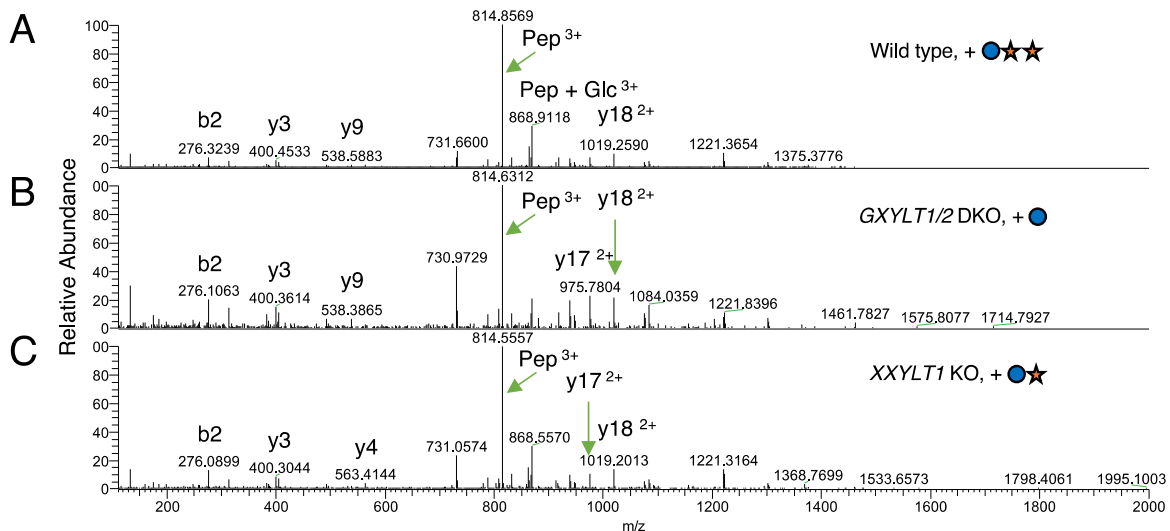

**Figure S2. MS/MS spectra of (glyco)peptides from NOTCH2.** MS/MS spectra of (glyco)peptide from NOTCH2. Samples were generated in wild type control HEK293T cells (A), *GXYLT1/2* DKO cells (B), *XXYL1* KO cells (C) transfected with the plasmids encoding mouse NOTCH2 ECDs as described in Materials and Methods. The data in Figure S2-1 through S2-16 are derived from the analysis of mouse NOTCH2 EGF1-36. MS/MS spectra confirmed the identity of (glyco)peptides based on the presence of peptide specific b- and y- ions and neutral loss of predicted glycans. Amino acid sequences are shown with the identified fragment ions at the upper right corner. For each EGF repeat from NOTCH2, MS/MS spectra of glycopeptides modified with the major glycoform derived from each

cell clone are shown. The sequence of peptides, the predicted and measured m/z, and the charge state are summarized in Table S2.

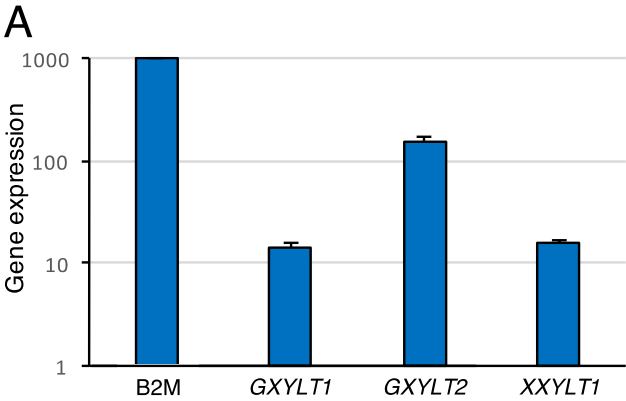

**B**

**XXYLT1 KO (clone: 3C4): 10-bp deletion in XXYLT1**

Wild Type: CCTCGCCAAGTTCGAGGCGCACGAGGTGCTTAA  
 Allele 1: CCTCGCCA-----GCACGAGGTGCTTAA

**GXYLT1/2 double KO (clone: 13D3, GXYLT1 KO cell background): 7-bp deletion (allele 1) or 3-bp and 7-bp deletion (allele 2) in GXYLT2**

**GXYLT1**

Wild Type: GGCCCGCAGCGCATCCCGGC-----GTGTCGGACAGgtacgggcag  
 Allele 1: GGCCCGCAGCGCAT-----TGTCGGACAGgtacgggcag  
 Allele 2: GGCCCGCAGCG-----ggcag  
 Allele 3: -- (76-bp-del) -----CTGCCGTACCTGTGTCGGACAGgtacgggcag

**GXYLT2**

Wild Type: GCTGTGGTGGCCTGTGGCAATCGGCTGGAG  
 Allele 1: GCTGTGGTGGCCTGT-----GGCTGGAG  
 Allele 2: GCTG---TGGCCTGTGGCAATC-----G

**Figure S3. GXYLT1, GXYLT2, and XXYLT1 are expressed in HEK293T cells.** (A) The RT-qPCR analysis confirmed the gene expression of GXYLT1, GXYLT2, and XXYLT1 in HEK293T cells. (B) Genomic sequence of the edited genomic regions in GXYLT1, GXYLT2, and XXYLT1 in wild type HEK293T cells and corresponding knockout clones.

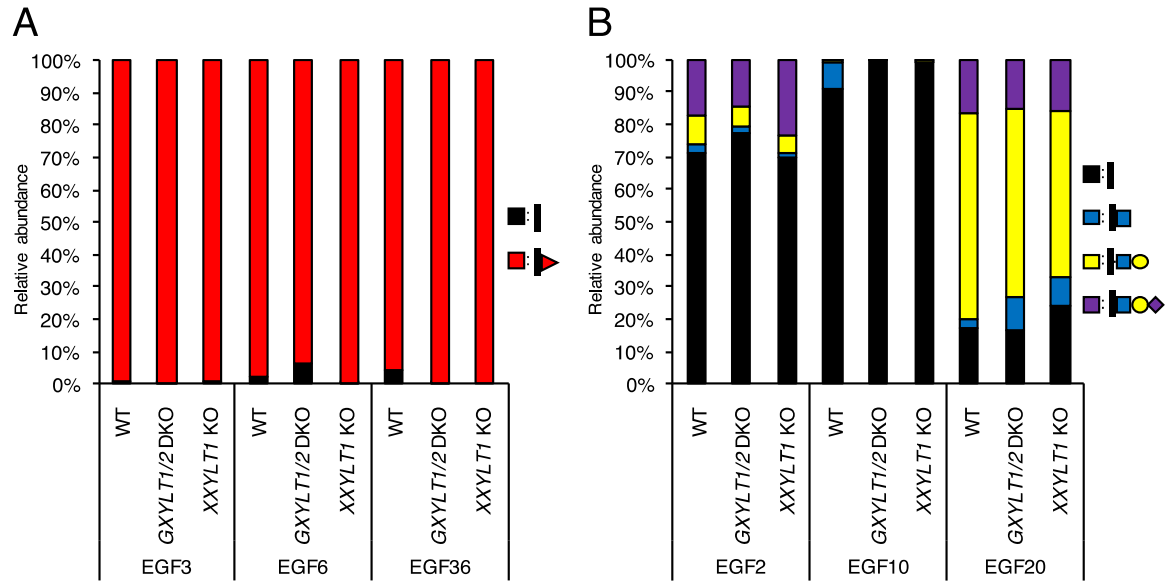

**Figure S4. Knockout of the xylosyltransferases does not affect the attachment and elongation of *O*-fucose and *O*-GlcNAc glycans.** EGF1-18, 19-36, and 24-28 from mouse NOTCH1 were produced in wild type, *GXYLT1/2* DKO, and *XXYLT1* KO HEK293T cells and purified from the medium as described in Materials and Methods. The protein was reduced, alkylated, purified by SDS-PAGE, and subjected to in-gel protease digestion. The resulting peptides were analyzed by LC-MS/MS, as described in Materials and Methods. (A) shows stoichiometry of *O*-fucose (Fuc) glycans on EGF3, EGF6 and EGF36 in NOTCH1, and (B) shows stoichiometry of *O*-GlcNAc glycans on EGF2, EGF10 and EGF20 in NOTCH1. Black bar, naked peptide; red triangle, Fuc; blue square, GlcNAc; yellow circle, galactose; purple diamond, Neu5Ac.

# EGF3

Figure S5-1

113-NGGTCDLLLTLEYK-126

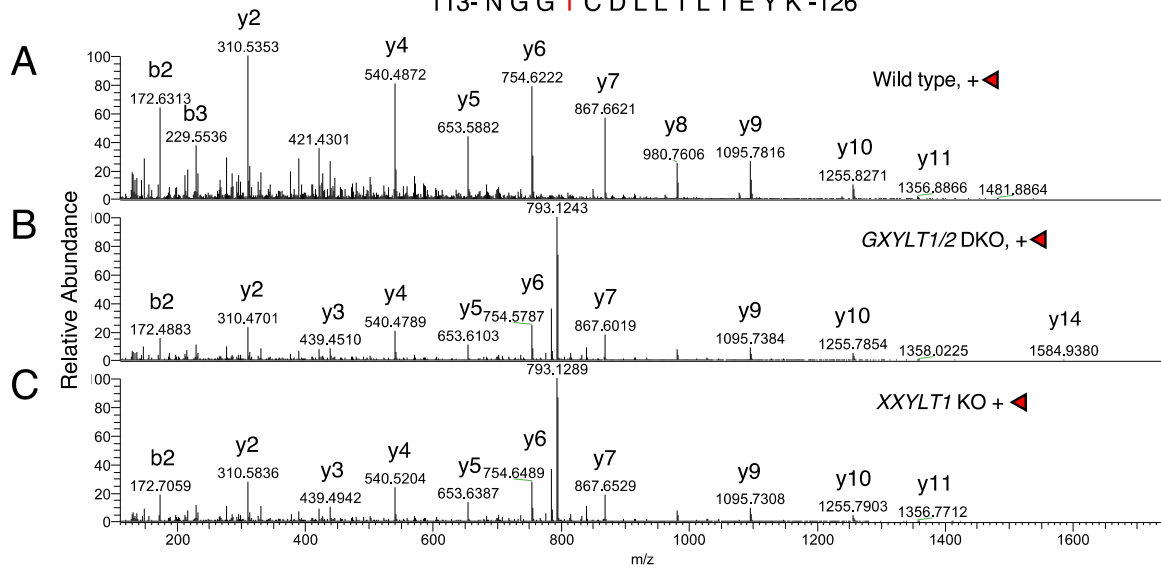

# EGF6

Figure S5-2

208-ATHTGPHCELPYVPCSPSPCQNGGTCR-234

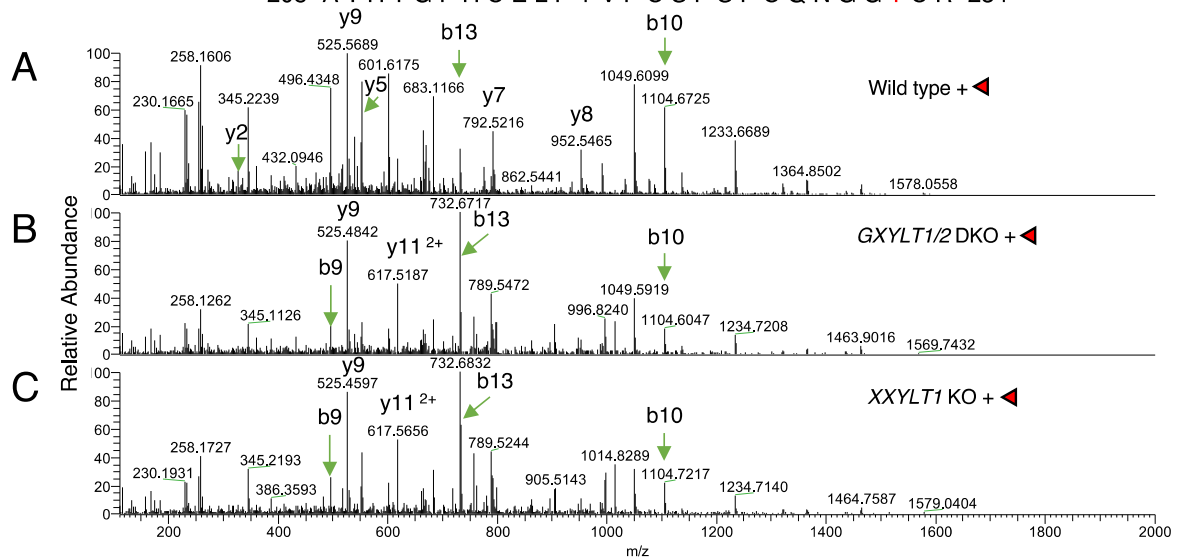

EGF36  
1369-SPTCLCLGSFTGPECQFPASSPCVGSNPCYNQG TCEPTSENPFYR-1413

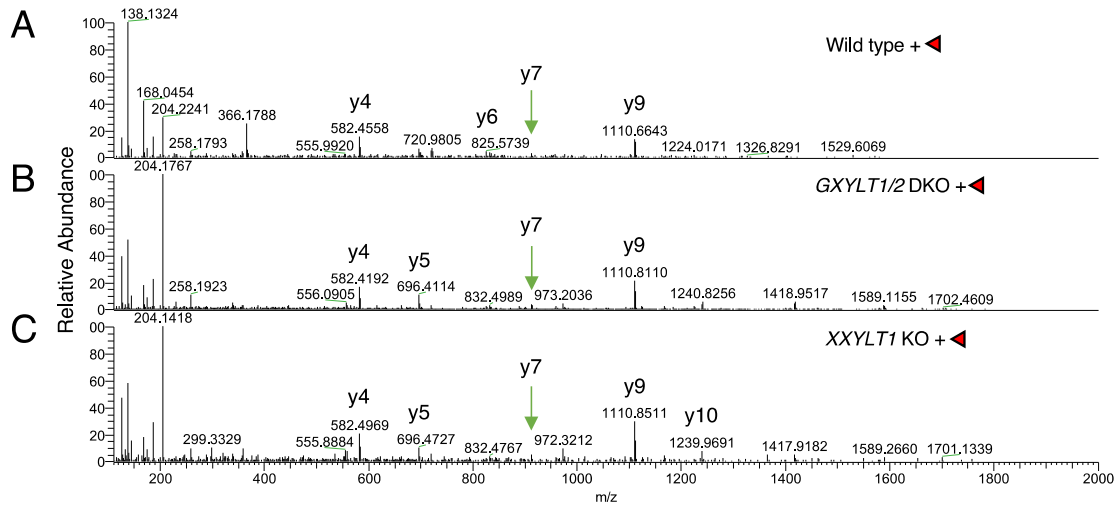

**Figure S5. MS/MS spectra of (glyco)peptides with the predicted O-fucose site from NOTCH1.** Samples were generated in wild type control HEK293T cells (A), *GXYLT1/2* DKO cells (B), *XXYLT1* KO cells (C) transfected with the plasmids encoding mouse NOTCH1 ECDs as described in Materials and Methods. The data in Figure S5-1 and S5-2 are derived from the analysis of mouse NOTCH1 EGF1-18. The data in Figure S5-3 are derived from the analysis of mouse NOTCH1 EGF19-36. MS/MS spectra confirmed the identity of (glyco)peptides based on the presence of peptide-specific b- and y-ions and neutral loss of predicted glycans. Amino acid sequences are shown with the identified fragment ions at the upper right corner. For each EGF repeat from NOTCH1, MS/MS spectra of glycopeptides modified with the major glycoform derived from each cell clone are shown. The sequence of peptides, the predicted and measured mass (m/z), and the charge state are summarized in Table S3.

EGF2  
70-NAGTCHVVDHGGTVDYACSCPLGFSGPLCLTPLDNACLANPCR-112

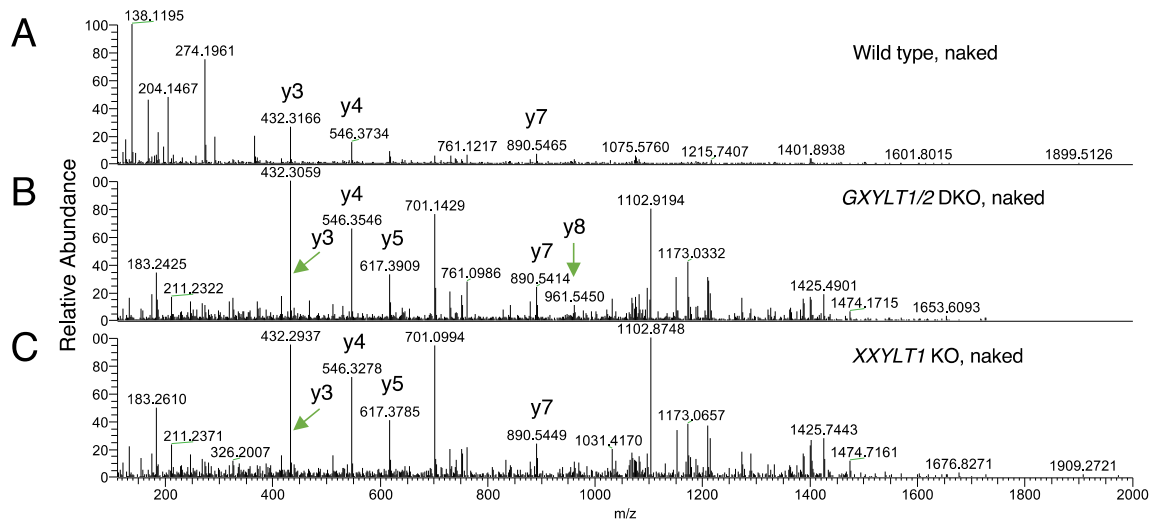

EGF10  
396-AICTCPSGYTGPACSQDVDECALGANPCEHAGK-428

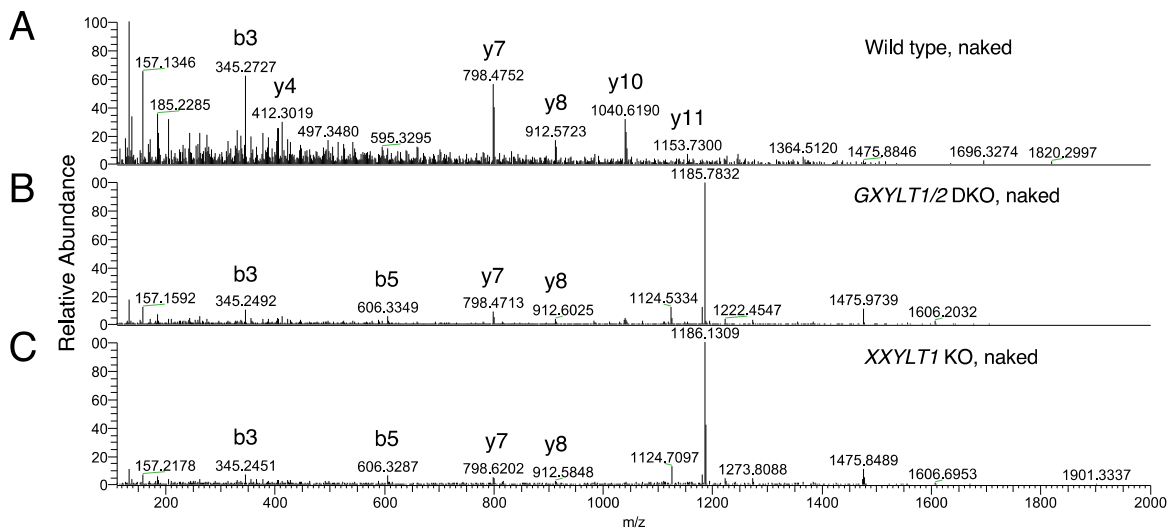

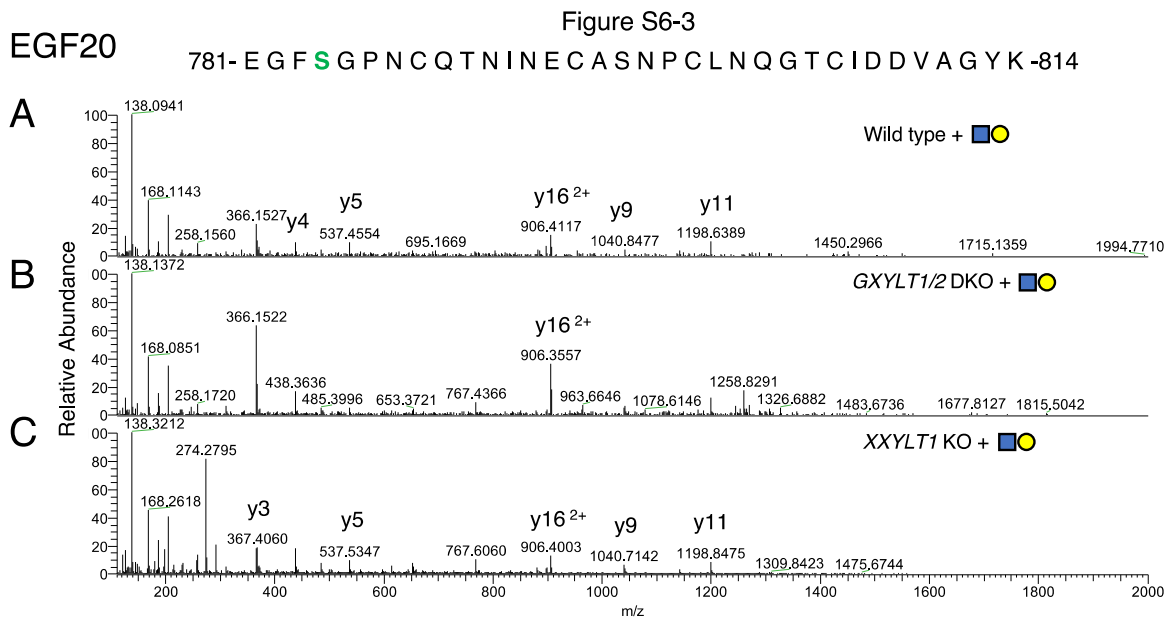

**Figure S6. MS/MS spectra of (glyco)peptides with the predicted O-GlcNAc site from NOTCH1.**

Samples were generated in wild type control HEK293T cells (A), *GXYLT1/2* DKO cells (B), *XXYLT1* KO cells (C) transfected with the plasmids encoding mouse NOTCH1 ECDs as described in Materials and Methods. The data in Figure S6-1 and S6-2 are derived from the analysis of mouse NOTCH1 EGF1-18. The data in Figure S6-3 are derived from the analysis of mouse NOTCH1 EGF19-36. MS/MS spectra confirmed the identity of (glyco)peptides based on the presence of peptide-specific b- and y-ions and neutral loss of predicted glycans. Amino acid sequences are shown with the identified fragment ions at the upper right corner. For each EGF repeat from NOTCH1, MS/MS spectra of glycopeptides modified with the major glycoform derived from each cell clone are shown. The sequence of peptides, the predicted and measured mass (m/z), and the charge state are summarized in Table S4.

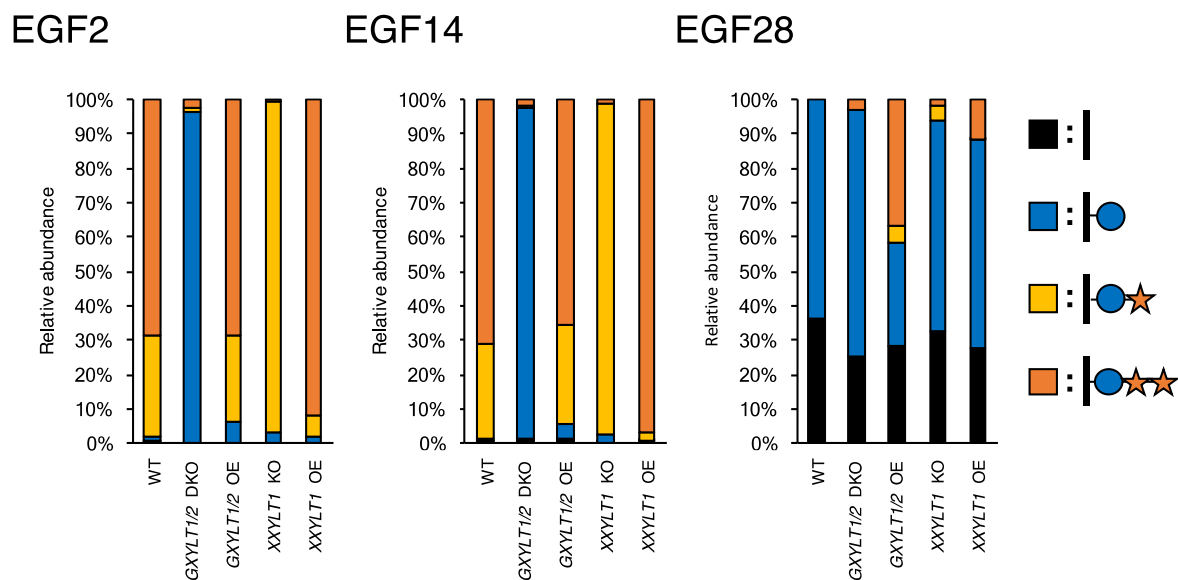

**Figure S7. Co-transfection of XYLs with NOTCH1 rescues xylosylation on NOTCH1.** NOTCH1 EGF1-18 and 19-36 are co-transfected with GXYLT1 and GXYLT2 in *GXYLT1/2* DKO cells or with *XXYL1* in *XXYL1* KO cells. The Notch proteins are purified from the medium as in Materials and Methods. Mass spectral data on EGF2, 14, and 28 are shown. Black bar, naked peptide; blue circle, O-Glc; orange star, xylose.

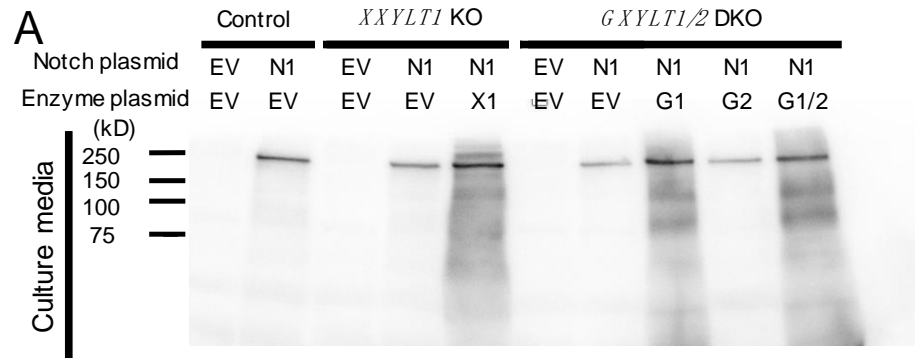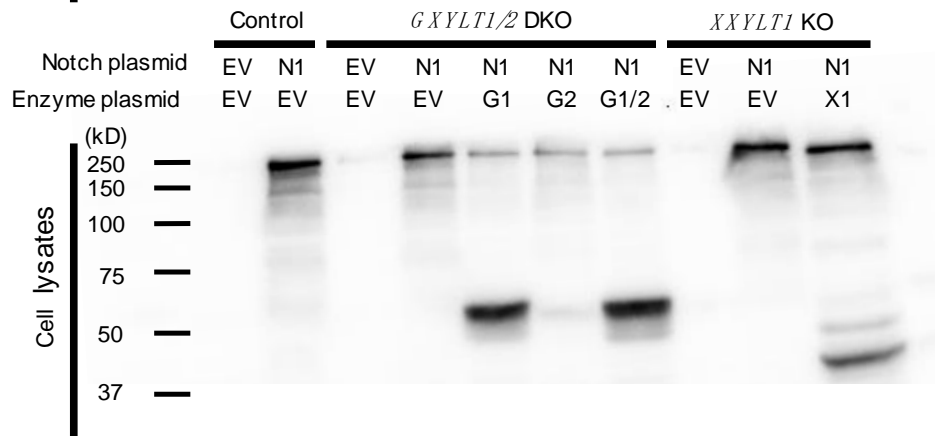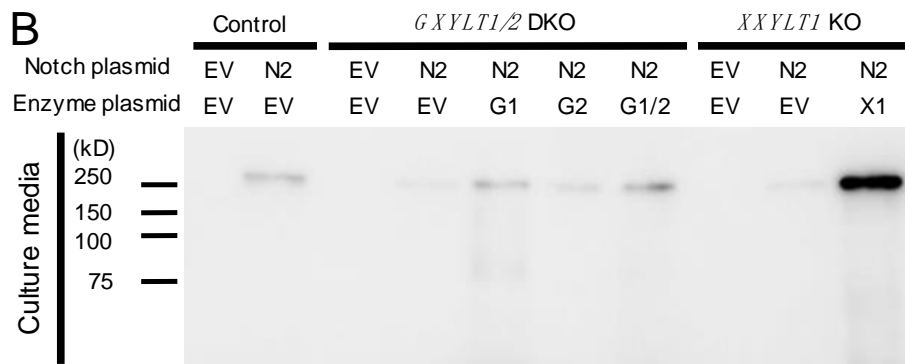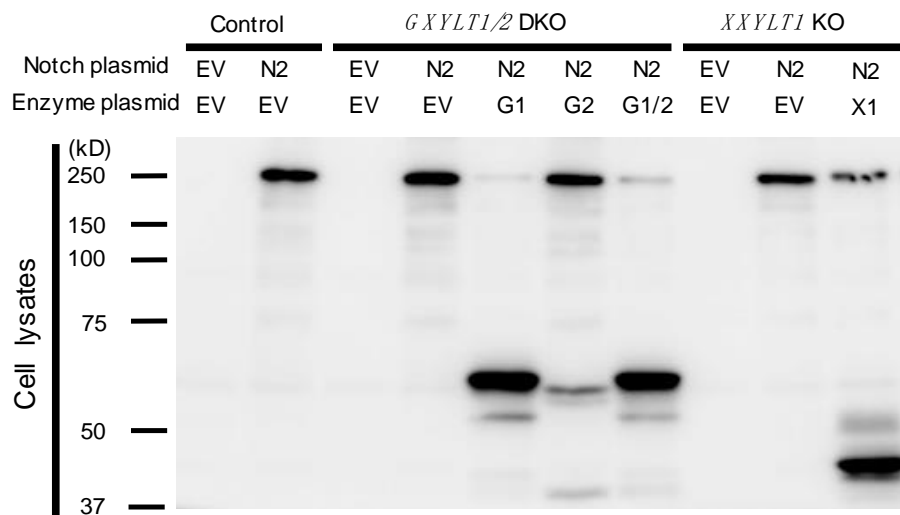

**Figure 8. The raw data for Figure 6 “Xylosyl-extension of O-Glc glycans enhances the secretion of the ECDs of NOTCH1 and NOTCH2 overexpressed in HEK293T cells.”** (A) Data for Figure 6A. Secretion assay with the Myc-His6-tagged version of the EGF1-36 of NOTCH1 (N1 EGF1-36) in the wild type control and *XYLTs'* KO clones. The N1 EGF1-36 proteins in the culture media and the cell lysates were detected by western blotting using an anti-Myc antibody. EV, empty vector; N1, NOTCH1; G1, GXYLT1; G2, GXYLT2, X1; XXYLT1. (B) Data for Figure 6C. Secretion assay with the Myc-His6-tagged version of the EGF1-36 of NOTCH2 (N2 EGF1-36) in the wild type control and *XYLTs'* KO clones. The N2 EGF1-36 proteins in the culture media and the cell lysates were detected by western blotting using an anti-Myc antibody. EV, empty vector; N1, NOTCH1; G1, GXYLT1; G2, GXYLT2, X1; XXYLT1.

**Table S1. Summary of mass spectral semi-quantification of NOTCH1 O-Glc glycans.** The number of EGF repeats, the number of amino acids counted from the N-terminal, the peptide sequences, predicted mass (m/z), charge state, glycoform, measured mass (m/z), and glycoform ratio of the analyzed peptides are shown. In the glycoform ratio column, the average height of EICs and the standard error of the mean are shown (N=3). \*Two biological replicates (N=2). The average and the range of two measurements are shown in the glycoform ratio column. Colored letters in sequences indicate post-translational modification sites. Blue, O-Glc; red, O-Fuc; green, O-GlcNAc.

| EGF | A.A.    | Sequence                                    | Predicted mass (m/z) | charge state | Glycoform      | WT                  |                 | GXylT1/2 DKO        |                 | XXylT1 KO           |                 |
|-----|---------|---------------------------------------------|----------------------|--------------|----------------|---------------------|-----------------|---------------------|-----------------|---------------------|-----------------|
|     |         |                                             |                      |              |                | measured mass (m/z) | Glycoform Ratio | measured mass (m/z) | Glycoform Ratio | measured mass (m/z) | Glycoform Ratio |
| 2   | 57-69   | CQDSNPCLSTPCK                               | 775.3081             | 2+           | naked          | 775.3086            | 1 ± 0 %         | 775.3055            | 1 ± 0 %         | 775.3214            | 0 ± 0 %         |
| 2   | 57-69   | CQDSNPCLSTPCK                               | 856.3345             | 2+           | Glc            | 856.3346            | 1 ± 0 %         | 856.3477            | 98 ± 1 %        | 856.4729            | 2 ± 0 %         |
| 2   | 57-69   | CQDSNPCLSTPCK                               | 922.3557             | 2+           | Xyl-Glc        | 933.3562            | 29 ± 3 %        | 922.2513            | 0 ± 0 %         | 933.1764            | 97 ± 0 %        |
| 2   | 57-69   | CQDSNPCLSTPCK                               | 988.3769             | 2+           | Xyl-Xyl-Glc    | 988.3775            | 69 ± 3 %        | 988.3156            | 1 ± 1 %         | 988.8435            | 0 ± 0 %         |
| 4   | 137-165 | SCQQADPCASNPCANGGQCLPFESSYICR               | 1112.1200            | 3+           | naked          | ND                  | 0 ± 0 %         | ND                  | 0 ± 0 %         | ND                  | 0 ± 0 %         |
| 4   | 137-165 | SCQQADPCASNPCANGGQCLPFESSYICR               | 1166.1376            | 3+           | Glc            | 1166.807            | 3 ± 0 %         | 1166.0687           | 100 ± 0 %       | 1166.0870           | 4 ± 1 %         |
| 4   | 137-165 | SCQQADPCASNPCANGGQCLPFESSYICR               | 1210.1517            | 3+           | Xyl-Glc        | 1210.821            | 15 ± 2 %        | 1210.6472           | 0 ± 0 %         | 1210.9284           | 95 ± 1 %        |
| 4   | 137-165 | SCQQADPCASNPCANGGQCLPFESSYICR               | 1254.1658            | 3+           | Xyl-Xyl-Glc    | 1254.833            | 82 ± 2 %        | 1254.3231           | 0 ± 0 %         | 1254.2387           | 0 ± 0 %         |
| 9   | 328-345 | TGEDCSENIDDCSAACF                           | 1011.3620            | 2+           | naked          | 1011.3359           | 100 ± 0 %       | 1011.4922           | 100 ± 0 %       | 1011.2375*          | 100 ± 0 %       |
| 9   | 328-345 | TGEDCSENIDDCSAACF                           | 1092.3884            | 2+           | Glc            | ND                  | 0 ± 0 %         | ND                  | 0 ± 0 %         | ND*                 | 0 ± 0 %         |
| 9   | 328-345 | TGEDCSENIDDCSAACF                           | 1158.4096            | 2+           | Xyl-Glc        | ND                  | 0 ± 0 %         | ND                  | 0 ± 0 %         | ND*                 | 0 ± 0 %         |
| 9   | 328-345 | TGEDCSENIDDCSAACF                           | 1224.4307            | 2+           | Xyl-Xyl-Glc    | ND                  | 0 ± 0 %         | ND                  | 0 ± 0 %         | ND*                 | 0 ± 0 %         |
| 10  | 366-395 | TGLLCHLNDACISNPCNEGSNCDTNPVNGK              | 1111.479             | 3+           | naked          | 1111.285            | 0 ± 0 %         | 1111.7050           | 1 ± 0 %         | 1111.7465           | 0 ± 0 %         |
| 10  | 366-395 | TGLLCHLNDACISNPCNEGSNCDTNPVNGK              | 1165.4966            | 3+           | Glc            | 1165.825            | 11 ± 1 %        | 1165.7761           | 24 ± 2 %        | 1165.4897           | 4 ± 2 %         |
| 10  | 366-395 | TGLLCHLNDACISNPCNEGSNCDTNPVNGK              | 1209.5107            | 3+           | Xyl-Glc        | 1209.844            | 9 ± 0 %         | 1209.4076           | 0 ± 0 %         | 1209.5458           | 43 ± 4 %        |
| 10  | 366-395 | TGLLCHLNDACISNPCNEGSNCDTNPVNGK              | 1253.5248            | 3+           | Xyl-Xyl-Glc    | 1253.857            | 28 ± 2 %        | 1253.2766           | 0 ± 0 %         | 1253.6475           | 0 ± 0 %         |
| 10  | 366-395 | TGLLCHLNDACISNPCNEGSNCDTNPVNGK              | 1219.5142            | 3+           | Hex-Glc        | 1219.846            | 24 ± 1 %        | 1219.1594           | 29 ± 4 %        | 1219.1119           | 13 ± 2 %        |
| 10  | 366-395 | TGLLCHLNDACISNPCNEGSNCDTNPVNGK              | 1316.546             | 3+           | Neu5Ac-Hex-Glc | 1316.879            | 27 ± 1 %        | 1316.4708           | 47 ± 4 %        | 1316.2974           | 39 ± 2 %        |
| 12  | 445-474 | TGPRCEIDVNECISNPCQNDA <sup>T</sup> CLDQIGEF | 1220.5197            | 3+           | naked          | ND                  | 0 ± 0 %         | 1220.4792           | 0 ± 0 %         | ND*                 | 0 ± 0 %         |
| 12  | 445-474 | TGPRCEIDVNECISNPCQNDA <sup>T</sup> CLDQIGEF | 1274.5373            | 3+           | Glc            | 1274.5638           | 0 ± 0 %         | 1274.0725           | 55 ± 6 %        | 1274.5297*          | 4 ± 3 %         |
| 12  | 445-474 | TGPRCEIDVNECISNPCQNDA <sup>T</sup> CLDQIGEF | 1318.5514            | 3+           | Xyl-Glc        | 1318.4622           | 2 ± 2 %         | 1318.3816           | 1 ± 0 %         | 1318.0804*          | 96 ± 4 %        |
| 12  | 445-474 | TGPRCEIDVNECISNPCQNDA <sup>T</sup> CLDQIGEF | 1362.5655            | 3+           | Xyl-Xyl-Glc    | 1362.1283           | 98 ± 2 %        | 1362.6799           | 0 ± 0 %         | 1362.4866*          | 0 ± 0 %         |
| 12  | 445-474 | TGPRCEIDVNECISNPCQNDA <sup>T</sup> CLDQIGEF | 1328.5549            | 3+           | Hex-Glc        | 1328.7328           | 0 ± 0 %         | 1328.4028           | 31 ± 3 %        | 1328.9224*          | 0 ± 0 %         |
| 12  | 445-474 | TGPRCEIDVNECISNPCQNDA <sup>T</sup> CLDQIGEF | 1425.5867            | 3+           | Neu5Ac-Hex-Glc | ND                  | 0 ± 0 %         | 1425.9257           | 13 ± 6 %        | 1425.9411*          | 0 ± 0 %         |
| 13  | 482-512 | CEINTDECASSPCLHNGHCMDKINEF                  | 785.5687             | 4+           | naked          | 785.2771            | 0 ± 0 %         | 785.0084            | 0 ± 0 %         | 785.0961*           | 0 ± 0 %         |
| 13  | 482-512 | CEINTDECASSPCLHNGHCMDKINEF                  | 826.0819             | 4+           | Glc            | 826.5149            | 0 ± 0 %         | 826.3158            | 100 ± 0 %       | 826.3374*           | 17 ± 13 %       |
| 13  | 482-512 | CEINTDECASSPCLHNGHCMDKINEF                  | 859.0924             | 4+           | Xyl-Glc        | 858.8657            | 1 ± 1 %         | 858.4297            | 0 ± 0 %         | 858.1957*           | 83 ± 13 %       |
| 13  | 482-512 | CEINTDECASSPCLHNGHCMDKINEF                  | 892.1030             | 4+           | Xyl-Xyl-Glc    | 892.1840            | 99 ± 1 %        | 892.3415            | 0 ± 0 %         | 892.2477*           | 0 ± 0 %         |

|    |           |                                                                        |            |    |             |            |           |            |           |            |           |
|----|-----------|------------------------------------------------------------------------|------------|----|-------------|------------|-----------|------------|-----------|------------|-----------|
| 14 | 519-538   | GFNGHLCQYDVDECA <b>ST</b> PCCK                                         | 786.6582   | 3+ | naked       | ND         | 1 ± 0 %   | 786.9038   | 1 ± 0 %   | 786.4928   | ± 0 %     |
| 14 | 519-538   | GFNGHLCQYDVDECA <b>ST</b> PCCK                                         | 840.6758   | 3+ | Glc         | ND         | 1 ± 0 %   | 840.1834   | 98 ± 1 %  | 840.6792   | 2 ± 0 %   |
| 14 | 519-538   | GFNGHLCQYDVDECA <b>ST</b> PCCK                                         | 884.6899   | 3+ | Xyl-Glc     | 885.0549   | 28 ± 5 %  | 884.1941   | 1 ± 0 %   | 884.6925   | 97 ± 1 %  |
| 14 | 519-538   | GFNGHLCQYDVDECA <b>ST</b> PCCK                                         | 928.704    | 3+ | Xyl-Xyl-Glc | 929.0391   | 71 ± 5 %  | 928.5175   | 1 ± 1 %   | 928.1634   | 0 ± 0 %   |
| 16 | 582-613   | DGVATFTCLCQPGY <b>T</b> GHH CETNINECH <b>S</b> QPCR                    | 1007.16418 | 4+ | naked       | ND         | 0 ± 0 %   | ND         | 0 ± 0 %   | ND         | 0 ± 0 %   |
| 16 | 582-613   | DGVATFTCLCQPGY <b>T</b> GHH CETNINECH <b>S</b> QPCR                    | 1047.67738 | 4+ | Glc         | ND         | 0 ± 0 %   | 1047.3729  | 100 ± 0 % | ND         | 0 ± 0 %   |
| 16 | 582-613   | DGVATFTCLCQPGY <b>T</b> GHH CETNINECH <b>S</b> QPCR                    | 1080.68795 | 4+ | Xyl-Glc     | ND         | 0 ± 0 %   | ND         | 0 ± 0 %   | 1080.2937  | 100 ± 0 % |
| 16 | 582-613   | DGVATFTCLCQPGY <b>T</b> GHH CETNINECH <b>S</b> QPCR                    | 1113.69853 | 4+ | Xyl-Xyl-Glc | 1114.2009  | 100 ± 0 % | ND         | 0 ± 0 %   | ND         | 0 ± 0 %   |
| 17 | 632-658   | G <b>T</b> TGPNC E INLDDCA <b>S</b> NPCDSGTCLDK                        | 1112.77643 | 3+ | naked       | 1111.4284  | 1 ± 0 %   | 1112.2847  | 28 ± 3 %  | 1112.4478  | 1 ± 1 %   |
| 17 | 632-658   | G <b>T</b> TGPNC E INLDDCA <b>S</b> NPCDSGTCLDK                        | 1166.79403 | 3+ | Glc         | 1166.8013  | 1 ± 0 %   | 1166.5844  | 68 ± 3 %  | 1166.7941  | 1 ± 1 %   |
| 17 | 632-658   | G <b>T</b> TGPNC E INLDDCA <b>S</b> NPCDSGTCLDK                        | 1210.80813 | 3+ | Xyl-Glc     | 1211.1553  | 29 ± 3 %  | 1211.3663  | 2 ± 1 %   | 1211.4894  | 97 ± 1 %  |
| 17 | 632-658   | G <b>T</b> TGPNC E INLDDCA <b>S</b> NPCDSGTCLDK                        | 1254.82223 | 3+ | Xyl-Xyl-Glc | 1254.8311  | 69 ± 3 %  | 1254.1699  | 2 ± 0 %   | 1254.6852  | 1 ± 1 %   |
| 19 | 704-731   | CPEGYHDPTCLSEVNEC <b>N</b> SNPCIHGACR                                  | 834.0869   | 3+ | naked       | 834.6639   | 29 ± 1 %  | 834.9720   | 24 ± 5 %  | 834.0064   | 33 ± 2 %  |
| 19 | 704-731   | CPEGYHDPTCLSEVNEC <b>N</b> SNPCIHGACR                                  | 874.6001   | 3+ | Glc         | 874.6599   | 4 ± 1 %   | 874.5538   | 75 ± 5 %  | 874.2295   | 3 ± 1 %   |
| 19 | 704-731   | CPEGYHDPTCLSEVNEC <b>N</b> SNPCIHGACR                                  | 907.6106   | 3+ | Xyl-Glc     | 907.9304   | 1 ± 1 %   | 907.0809   | 0 ± 0 %   | 907.7001   | 64 ± 2 %  |
| 19 | 704-731   | CPEGYHDPTCLSEVNEC <b>N</b> SNPCIHGACR                                  | 940.6212   | 3+ | Xyl-Xyl-Glc | 940.8922   | 66 ± 3 %  | 940.7333   | 1 ± 1 %   | 940.5528   | 0 ± 0 %   |
| 20 | 739-769   | CDCAPGW <b>S</b> GTNCDINNNECE <b>S</b> NPCVN <b>G</b> GT <b>C</b> K    | 1232.1293  | 3+ | naked       | 1232.0637  | 14 ± 2 %  | 1232.8530  | 13 ± 3 %  | 1232.0841  | 19 ± 2 %  |
| 20 | 739-769   | CDCAPGW <b>S</b> GTNCDINNNECE <b>S</b> NPCVN <b>G</b> GT <b>C</b> K    | 1286.1469  | 3+ | Glc         | 1286.7441  | 2 ± 1 %   | 1286.4574  | 86 ± 3 %  | 1286.5417  | 2 ± 1 %   |
| 20 | 739-769   | CDCAPGW <b>S</b> GTNCDINNNECE <b>S</b> NPCVN <b>G</b> GT <b>C</b> K    | 1330.161   | 3+ | Xyl-Glc     | 1329.7700  | 1 ± 1 %   | 1329.8492  | 1 ± 0 %   | 1330.5839  | 79 ± 1 %  |
| 20 | 739-769   | CDCAPGW <b>S</b> GTNCDINNNECE <b>S</b> NPCVN <b>G</b> GT <b>C</b> K    | 1374.1751  | 3+ | Xyl-Xyl-Glc | 1374.7952  | 84 ± 2 %  | 1374.6488  | 1 ± 1 %   | 1374.9282  | 0 ± 0 %   |
| 21 | 781-814   | EGF <b>S</b> GPNCQTNINECA <b>S</b> NPCLNQ <b>G</b> T <b>C</b> IDDVAGYK | 1076.4501  | 4+ | naked       | 1076.9028  | 3 ± 1 %   | 1076.2213  | 32 ± 10 % | 1076.6600  | 8 ± 6 %   |
| 21 | 781-814   | EGF <b>S</b> GPNCQTNINECA <b>S</b> NPCLNQ <b>G</b> T <b>C</b> IDDVAGYK | 1116.9633  | 4+ | Glc         | 1116.1684  | 0 ± 0 %   | 1116.8744  | 65 ± 6 %  | 1116.4807  | 2 ± 1 %   |
| 21 | 781-814   | EGF <b>S</b> GPNCQTNINECA <b>S</b> NPCLNQ <b>G</b> T <b>C</b> IDDVAGYK | 1149.97388 | 4+ | Xyl-Glc     | 1149.1235  | 21 ± 10 % | 1150.7433  | 0 ± 0 %   | 1149.3826  | 88 ± 5 %  |
| 21 | 781-814   | EGF <b>S</b> GPNCQTNINECA <b>S</b> NPCLNQ <b>G</b> T <b>C</b> IDDVAGYK | 1182.98445 | 4+ | Xyl-Xyl-Glc | 1182.7345  | 76 ± 11 % | 1182.1546  | 4 ± 4 %   | 1182.4293  | 2 ± 1 %   |
| 25 | 942-967   | CEEDINECA <b>S</b> NPCQNGADCTDCVDSY                                    | 1034.02793 | 3+ | naked       | 1033.8633* | 30 ± 13 % | 1033.0846* | 25 ± 4 %  | 1033.7456* | 64 ± 0 %  |
| 25 | 942-967   | CEEDINECA <b>S</b> NPCQNGADCTDCVDSY                                    | 1088.04553 | 3+ | Glc         | 1087.8568* | 0 ± 0 %   | 1088.2751* | 75 ± 4 %  | 1088.5379* | 0 ± 0 %   |
| 25 | 942-967   | CEEDINECA <b>S</b> NPCQNGADCTDCVDSY                                    | 1132.05963 | 3+ | Xyl-Glc     | 1132.7153* | 1 ± 1 %   | 1132.7887* | 0 ± 0 %   | 1132.8135* | 36 ± 0 %  |
| 25 | 942-967   | CEEDINECA <b>S</b> NPCQNGADCTDCVDSY                                    | 1176.07373 | 3+ | Xyl-Xyl-Glc | 1176.6862* | 69 ± 12 % | 1176.9320* | 0 ± 0 %   | 1176.1529* | 0 ± 0 %   |
| 27 | 1021-1043 | DVNECD <b>S</b> RPCLHGG <b>T</b> CQDSYGT <b>Y</b>                      | 952.0408   | 3+ | naked       | 952.0937   | 45 ± 11 % | 952.6852   | 30 ± 4 %  | 952.2100*  | 20 ± 16 % |
| 27 | 1021-1043 | DVNECD <b>S</b> RPCLHGG <b>T</b> CQDSYGT <b>Y</b>                      | 1006.0584  | 3+ | Glc         | 1006.1933  | 49 ± 15 % | 1006.1989  | 70 ± 4 %  | 1006.7749* | 78 ± 16 % |
| 27 | 1021-1043 | DVNECD <b>S</b> RPCLHGG <b>T</b> CQDSYGT <b>Y</b>                      | 1050.0725  | 3+ | Xyl-Glc     | ND         | 0 ± 0 %   | ND         | 0 ± 0 %   | 1050.6274* | 2 ± 0 %   |
| 27 | 1021-1043 | DVNECD <b>S</b> RPCLHGG <b>T</b> CQDSYGT <b>Y</b>                      | 1094.0866  | 3+ | Xyl-Xyl-Glc | 1094.5572  | 6 ± 4 %   | ND         | 0 ± 0 %   | ND*        | 0 ± 0 %   |
| 28 | 1062-1069 | WCD <b>S</b> APCK                                                      | 512.2053   | 2+ | naked       | 512.4991   | 36 ± 1 %  | 512.3639   | 37 ± 5 %  | 512.4764   | 41 ± 4 %  |
| 28 | 1062-1069 | WCD <b>S</b> APCK                                                      | 593.2317   | 2+ | Glc         | 593.7694   | 64 ± 1 %  | 593.4158   | 63 ± 5 %  | 593.2895   | 57 ± 4 %  |
| 28 | 1062-1069 | WCD <b>S</b> APCK                                                      | 659.25285  | 2+ | Xyl-Glc     | 660.4237   | 0 ± 0 %   | 659.4829   | 0 ± 0 %   | 659.1278   | 2 ± 1 %   |
| 28 | 1062-1069 | WCD <b>S</b> APCK                                                      | 703.26695  | 2+ | Xyl-Xyl-Glc | 703.8407   | 0 ± 0 %   | 703.1400   | 0 ± 0 %   | ND         | 0 ± 0 %   |
| 31 | 1176-1205 | HGSDCSEEINECL <b>S</b> QPCQNGG <b>T</b> CIDLTNSY                       | 1198.1480  | 3+ | naked       | 1198.3647* | 29 ± 3 %  | 1198.6564  | 20 ± 2 %  | 1198.0699* | 0 ± 0 %   |
| 31 | 1176-1205 | HGSDCSEEINECL <b>S</b> QPCQNGG <b>T</b> CIDLTNSY                       | 1252.1656  | 3+ | Glc         | ND*        | 0 ± 0 %   | 1253.2573  | 80 ± 2 %  | 1252.7629* | 1 ± 0 %   |

|    |           |                                                  |            |    |             |            |          |           |          |            |          |
|----|-----------|--------------------------------------------------|------------|----|-------------|------------|----------|-----------|----------|------------|----------|
| 31 | 1176-1205 | HGSDCSEEINECL <b>S</b> QPCQNGG <b>T</b> CIDLTNSY | 1296.1797  | 3+ | Xyl-Glc     | ND*        | 0 ± 0 %  | 1296.4331 | 0 ± 0 %  | 1296.7633* | 97 ± 1 % |
| 31 | 1176-1205 | HGSDCSEEINECL <b>S</b> QPCQNGG <b>T</b> CIDLTNSY | 1340.1938  | 3+ | Xyl-Xyl-Glc | 1340.5931* | 71 ± 3 % | 1340.8524 | 0 ± 0 %  | 1340.8941* | 2 ± 1 %  |
| 33 | 1264-1279 | CEGDVNECL <b>S</b> NP CDPR                       | 952.864525 | 2+ | naked       | 952.1117   | 33 ± 4 % | 952.8756  | 31 ± 4 % | 952.3445   | 38 ± 2 % |
| 33 | 1264-1279 | CEGDVNECL <b>S</b> NP CDPR                       | 1033.89093 | 2+ | Glc         | 1033.2603  | 6 ± 0 %  | 1033.2455 | 68 ± 5 % | 1033.2875  | 4 ± 1 %  |
| 33 | 1264-1279 | CEGDVNECL <b>S</b> NP CDPR                       | 1100.41208 | 2+ | Xyl-Glc     | 1100.8854  | 25 ± 5 % | 1100.3941 | 1 ± 0 %  | 1100.6274  | 58 ± 2 % |

**Table S2. Summary of mass spectral semi-quantification of NOTCH2 O-Glc glycans.** The number of EGF repeats, the number of amino acids counted from the N-terminal, the peptide sequences, predicted mass (m/z), charge state, glycoform, measured mass (m/z), and glycoform ratio of the analyzed peptides are shown. In the glycoform ratio column, the average height of EICs and the standard error of the mean are shown (N=3). \* Two biological replicates (N=2). The average and the range of two measurements are shown in the glycoform ratio column. Colored letters in sequences indicate post-translational modification sites. Blue, O-Glc; red, O-Fuc; green, O-GlcNAc.

| EGF | A.A.    | Sequence                                 | Predicted mass (m/z) | charge state | Glycoform   | WT                  |                 | GXYLT1/2 DKO        |                 | XXYLT1 KO           |                 |
|-----|---------|------------------------------------------|----------------------|--------------|-------------|---------------------|-----------------|---------------------|-----------------|---------------------|-----------------|
|     |         |                                          |                      |              |             | measured mass (m/z) | Glycoform Ratio | measured mass (m/z) | Glycoform Ratio | measured mass (m/z) | Glycoform Ratio |
| 4   | 141-169 | QCQWTDACL <b>S</b> HPCENGSTCTSVASQFSCK   | 1184.8130            | 3+           | naked       | 1184.2549           | 0 ± 0 %         | 1184.3248           | 0 ± 0 %         | 1184.2576           | 0 ± 0 %         |
| 4   | 141-169 | QCQWTDACL <b>S</b> HPCENGSTCTSVASQFSCK   | 1238.8306            | 3+           | Glc         | 1238.7652           | 40 ± 3 %        | 1238.8564           | 100 ± 0 %       | 1238.4761           | 26 ± 8 %        |
| 4   | 141-169 | QCQWTDACL <b>S</b> HPCENGSTCTSVASQFSCK   | 1282.8447            | 3+           | Xyl-Glc     | 1282.4973           | 59 ± 3 %        | 1282.7761           | 0 ± 0 %         | 1282.8400           | 72 ± 8 %        |
| 4   | 141-169 | QCQWTDACL <b>S</b> HPCENGSTCTSVASQFSCK   | 1326.8588            | 3+           | Xyl-Xyl-Glc | ND                  | 0 ± 0 %         | ND                  | 0 ± 0 %         | ND                  | 0 ± 0 %         |
| 10  | 369-389 | AGLLCHLDDACI <b>S</b> NPCHK              | 521.2407             | 4+           | naked       | 521.2441            | 0 ± 0 %         | 521.7644            | 1 ± 1 %         | 521.9007            | 0 ± 0 %         |
| 10  | 369-389 | AGLLCHLDDACI <b>S</b> NPCHK              | 561.7539             | 4+           | Glc         | 561.8347            | 61 ± 10 %       | 561.3817            | 99 ± 1 %        | 561.7539            | 51 ± 5 %        |
| 10  | 369-389 | AGLLCHLDDACI <b>S</b> NPCHK              | 594.7645             | 4+           | Xyl-Glc     | 594.0902            | 13 ± 6 %        | 594.3344            | 0 ± 0 %         | 594.6254            | 48 ± 5 %        |
| 10  | 369-389 | AGLLCHLDDACI <b>S</b> NPCHK              | 672.7751             | 4+           | Xyl-Xyl-Glc | 672.1874            | 21 ± 4 %        | 672.6055            | 0 ± 0 %         | 672.1811            | 0 ± 0 %         |
| 12  | 453-474 | CEMDINECH <b>S</b> DPCQNDA <b>T</b> CLDK | 953.6956             | 3+           | naked       | ND                  | 0 ± 0 %         | ND                  | 0 ± 0 %         | 953.3561            | 0 ± 0 %         |
| 12  | 453-474 | CEMDINECH <b>S</b> DPCQNDA <b>T</b> CLDK | 1007.7132            | 3+           | Glc         | ND                  | 0 ± 0 %         | 1007.7146           | 82 ± 7 %        | ND                  | 0 ± 0 %         |
| 12  | 453-474 | CEMDINECH <b>S</b> DPCQNDA <b>T</b> CLDK | 1051.7273            | 3+           | Xyl-Glc     | 1051.3447           | 3 ± 4 %         | ND                  | 0 ± 0 %         | 1051.7280           | 98 ± 1 %        |
| 12  | 453-474 | CEMDINECH <b>S</b> DPCQNDA <b>T</b> CLDK | 1095.7414            | 3+           | Xyl-Xyl-Glc | 1096.0747           | 97 ± 4 %        | 1096.0762           | 2 ± 1 %         | ND                  | 0 ± 0 %         |
| 12  | 453-474 | CEMDINECH <b>S</b> DPCQNDA <b>T</b> CLDK | 1061.7308            | 3+           | Hex-Glc     | ND                  | 0 ± 0 %         | 1061.7318           | 16 ± 6 %        | ND                  | 1 ± 1 %         |
| 13  | 488-512 | GVHCELEVNEC <b>S</b> NP CVNNGQCVDK       | 983.0808             | 3+           | naked       | 983.4023            | 0 ± 0 %         | ND                  | 1 ± 1 %         | ND                  | 0 ± 0 %         |

|    |         |                                               |           |    |             |               |           |               |           |               |           |
|----|---------|-----------------------------------------------|-----------|----|-------------|---------------|-----------|---------------|-----------|---------------|-----------|
| 13 | 488-512 | GVHCELEVNECQSNPCVNNGQCVDK                     | 1037.0984 | 3+ | Glc         | ND            | 0 ± %     | 1037.432<br>0 | 97 ± 1 %  | ND            | 0 ± 1 %   |
| 13 | 488-512 | GVHCELEVNECQSNPCVNNGQCVDK                     | 1081.1125 | 3+ | Xyl-Glc     | 1081.696<br>8 | 4 ± 3 %   | ND            | 0 ± 0 %   | 1081.445<br>0 | 99 ± 1 %  |
| 13 | 488-512 | GVHCELEVNECQSNPCVNNGQCVDK                     | 1125.1266 | 3+ | Xyl-Xyl-Glc | 1125.459<br>3 | 95 ± 3 %  | 1125.127<br>2 | 1 ± 0 %   | 1125.793<br>7 | 0 ± 0 %   |
| 14 | 516-546 | FQCLCPPGFTGPVCQIDIDDCSSTPCLNGAK               | 1240.2063 | 3+ | naked       | 1241.260<br>1 | 0 ± 0 %   | ND            | 0 ± 0 %   | ND            | 0 ± 0 %   |
| 14 | 516-546 | FQCLCPPGFTGPVCQIDIDDCSSTPCLNGAK               | 1294.2239 | 3+ | Glc         | 1294.744<br>8 | 4 ± 0 %   | 1294.557<br>4 | 100 ± 0 % | ND            | 1 ± 1 %   |
| 14 | 516-546 | FQCLCPPGFTGPVCQIDIDDCSSTPCLNGAK               | 1338.2380 | 3+ | Xyl-Glc     | 1338.397<br>1 | 4 ± 2 %   | ND            | 0 ± 0 %   | 1338.571<br>2 | 99 ± 1 %  |
| 14 | 516-546 | FQCLCPPGFTGPVCQIDIDDCSSTPCLNGAK               | 1382.2521 | 3+ | Xyl-Xyl-Glc | 1382.291<br>5 | 92 ± 2 %  | ND            | 0 ± 0 %   | ND            | 0 ± 0 %   |
| 16 | 611-619 | CYSSPCLND                                     | 549.6975  | 2+ | naked       | 549.3762      | 1 ± 1 %   | 549.8763      | 17 ± 3 %  | 549.1278      | 6 ± 0 %   |
| 16 | 611-619 | CYSSPCLND                                     | 630.7239  | 2+ | Glc         | 630.2768      | 9 ± 1 %   | 630.0487      | 83 ± 3 %  | 630.4875      | 26 ± 4 %  |
| 16 | 611-619 | CYSSPCLND                                     | 696.7451  | 2+ | Xyl-Glc     | 696.6941      | 6 ± 5 %   | 696.4211      | 0 ± 0 %   | 696.7422      | 68 ± 4 %  |
| 16 | 611-619 | CYSSPCLND                                     | 762.7662  | 2+ | Xyl-Xyl-Glc | 762.8571      | 84 ± 5 %  | 762.3674      | 0 ± 0 %   | 762.4855      | 0 ± 0 %   |
| 18 | 679-692 | CNIDIDECASNPCR                                | 862.3458  | 2+ | naked       | 861.3684      | 3 ± 0 %   | 862.2873      | 1 ± 1 %   | 862.0773      | 2 ± 1 %   |
| 18 | 679-692 | CNIDIDECASNPCR                                | 943.3722  | 2+ | Glc         | 943.4132      | 2 ± 0 %   | 943.5864      | 98 ± 1 %  | 943.2765      | 1 ± 0 %   |
| 18 | 679-692 | CNIDIDECASNPCR                                | 1009.3934 | 2+ | Xyl-Glc     | 1009.394<br>1 | 37 ± 3 %  | 1009.936<br>6 | 0 ± 0 %   | 1009.401<br>8 | 97 ± 1 %  |
| 18 | 679-692 | CNIDIDECASNPCR                                | 1075.9159 | 2+ | Xyl-Xyl-Glc | 1075.916<br>2 | 59 ± 3 %  | 1076.852<br>3 | 0 ± 0 %   | 1075.386<br>4 | 0 ± 0 %   |
| 19 | 706-742 | CICPEGPHHPSCYSQVNECLSNPCIHGDCTGGLSGYK         | 850.558   | 5+ | naked       | ND            | 0 ± 0 %   | 850.1234      | 9 ± 1 %   | ND            | 0 ± 0 %   |
| 19 | 706-742 | CICPEGPHHPSCYSQVNECLSNPCIHGDCTGGLSGYK         | 882.9686  | 5+ | Glc         | ND            | 0 ± 0 %   | 882.8974      | 91 ± 1 %  | 882.1453      | 1 ± 0 %   |
| 19 | 706-742 | CICPEGPHHPSCYSQVNECLSNPCIHGDCTGGLSGYK         | 909.3770  | 5+ | Xyl-Glc     | ND            | 0 ± 0 %   | ND            | 0 ± 0 %   | 909.3866      | 99 ± 0 %  |
| 19 | 706-742 | CICPEGPHHPSCYSQVNECLSNPCIHGDCTGGLSGYK         | 935.7855  | 5+ | Xyl-Xyl-Glc | 935.9877      | 100 ± 0 % | ND            | 0 ± 0 %   | ND            | 0 ± 0 %   |
| 20 | 759-780 | NECLSNPCQNGGTCTNNLVNGYR                       | 896.3798  | 3+ | naked       | ND            | 0 ± 0 %   | ND            | 0 ± 0 %   | ND            | 0 ± 0 %   |
| 20 | 759-780 | NECLSNPCQNGGTCTNNLVNGYR                       | 950.3947  | 3+ | Glc         | ND            | 0 ± 0 %   | 950.7438      | 100 ± 0 % | ND            | 0 ± 0 %   |
| 20 | 759-780 | NECLSNPCQNGGTCTNNLVNGYR                       | 994.4115  | 3+ | Xyl-Glc     | ND            | 0 ± 0 %   | ND            | 0 ± 0 %   | 994.6183      | 100 ± 0 % |
| 20 | 759-780 | NECLSNPCQNGGTCTNNLVNGYR                       | 1038.426  | 3+ | Xyl-Xyl-Glc | 1038.795<br>2 | 100 ± 0 % | ND            | 0 ± 0 %   | ND            | 0 ± 0 %   |
| 21 | 789-828 | GYNCQVNIDECASNPCLNQGTCTFDDVSGYTCHCMLPYTG<br>K | 1213.9940 | 4+ | naked       | 1213.463<br>7 | 0 ± 0 %   | 1213.346<br>8 | 0 ± 0 %   | 1213.471<br>1 | 0 ± 0 %   |
| 21 | 789-828 | GYNCQVNIDECASNPCLNQGTCTFDDVSGYTCHCMLPYTG<br>K | 1254.5072 | 4+ | Glc         | 1254.379<br>8 | 16 ± 4 %  | 1254.676<br>8 | 100 ± 0 % | 1254.871<br>5 | 5 ± 3 %   |

|    |           |                                              |           |    |                |               |           |               |           |               |           |
|----|-----------|----------------------------------------------|-----------|----|----------------|---------------|-----------|---------------|-----------|---------------|-----------|
| 21 | 789-828   | GYNCQVNIDECASNPCLNQGTCFDDVSGYTCHCMLPYTG<br>K | 1287.5178 | 4+ | Xyl-Glc        | 1287.060<br>4 | 5 ± 5 %   | 1287.167<br>6 | 0 ± 0 %   | 1287.498<br>6 | 95 ± 3 %  |
| 21 | 789-828   | GYNCQVNIDECASNPCLNQGTCFDDVSGYTCHCMLPYTG<br>K | 1320.5284 | 4+ | Xyl-Xyl-Glc    | 1320.529<br>6 | 79 ± 5 %  | 1320.293<br>4 | 0 ± 0 %   | 1319.378<br>5 | 0 ± 0 %   |
| 23 | 870-880   | CTVDVDECISK                                  | 663.2895  | 2+ | naked          | ND            | 100 ± 0 % | ND            | 100 ± 0 % | ND            | 100 ± 0 % |
| 23 | 870-880   | CTVDVDECISK                                  | 744.3159  | 2+ | Glc            | ND            | 0 ± 0 %   | ND            | 0 ± 0 %   | ND            | 0 ± 0 %   |
| 23 | 870-880   | CTVDVDECISK                                  | 810.3371  | 2+ | Xyl-Glc        | ND            | 0 ± 0 %   | ND            | 0 ± 0 %   | ND            | 0 ± 0 %   |
| 23 | 870-880   | CTVDVDECISK                                  | 876.3582  | 2+ | Xyl-Xyl-Glc    | ND            | 0 ± 0 %   | ND            | 0 ± 0 %   | ND            | 0 ± 0 %   |
| 25 | 946-959   | CQTMNECLSEPCK                                | 886.3419  | 2+ | naked          | 886.4763      | 3 ± 0 %   | 886.4476      | 2 ± 1 %   | 886.9701      | 0 ± 0 %   |
| 25 | 946-959   | CQTMNECLSEPCK                                | 967.3683  | 2+ | Glc            | 967.4822      | 0 ± 0 %   | 967.2399      | 98 ± 1 %  | 967.0544      | 0 ± 0 %   |
| 25 | 946-959   | CQTMNECLSEPCK                                | 1033.3894 | 2+ | Xyl-Glc        | 1033.476<br>9 | 31 ± 5 %  | 1033.276<br>8 | 0 ± 0 %   | 1033.351<br>9 | 100 ± 0 % |
| 25 | 946-959   | CQTMNECLSEPCK                                | 1099.9120 | 2+ | Xyl-Xyl-Glc    | 1099.286<br>5 | 66 ± 5 %  | 1099.470<br>0 | 0 ± 0 %   | 1100.835<br>5 | 0 ± 0 %   |
| 27 | 1022-1047 | CLHDINECSSNPCLNAGTCVDGLGTY                   | 1019.418  | 3+ | naked          | ND            | 0 ± 0 %   | ND            | 0 ± 0 %   | ND            | 0 ± 0 %   |
| 27 | 1022-1047 | CLHDINECSSNPCLNAGTCVDGLGTY                   | 1073.435  | 3+ | Glc            | 1073.482<br>6 | 0 ± 0 %   | 1073.253<br>5 | 100 ± 0 % | 1073.963<br>7 | 0 ± 0 %   |
| 27 | 1022-1047 | CLHDINECSSNPCLNAGTCVDGLGTY                   | 1117.449  | 3+ | Xyl-Glc        | 1117.324<br>9 | 0 ± 0 %   | 1117.112<br>5 | 0 ± 0 %   | 1117.287<br>7 | 100 ± 0 % |
| 27 | 1022-1047 | CLHDINECSSNPCLNAGTCVDGLGTY                   | 1161.463  | 3+ | Xyl-Xyl-Glc    | 1161.554<br>3 | 100 ± 0 % | 1161.942<br>2 | 0 ± 0 %   | 1161.735<br>0 | 0 ± 0 %   |
| 30 | 1153-1174 | CASNPCQHGATCNDFIGGYRCE                       | 880.3401  | 3+ | naked          | ND            | 0 ± 0 %   | ND            | 0 ± 0 %   | ND            | 0 ± 0 %   |
| 30 | 1153-1174 | CASNPCQHGATCNDFIGGYRCE                       | 961.3665  | 3+ | Glc            | 961.5782      | 6 ± 1 %   | 961.7420      | 100 ± 0 % | 961.4750      | 4 ± 1 %   |
| 30 | 1153-1174 | CASNPCQHGATCNDFIGGYRCE                       | 1005.3806 | 3+ | Xyl-Glc        | 1005.679<br>4 | 31 ± 4 %  | 1005.334<br>9 | 0 ± 0 %   | 1005.363<br>7 | 96 ± 1 %  |
| 30 | 1153-1174 | CASNPCQHGATCNDFIGGYRCE                       | 1049.3947 | 3+ | Xyl-Xyl-Glc    | 1049.287<br>1 | 63 ± 4 %  | 1049.286<br>4 | 0 ± 0 %   | 1049.057<br>2 | 0 ± 0 %   |
| 33 | 1261-1285 | CEGDINECLSNPCSSSEGLDCVQLK                    | 958.0696  | 3+ | naked          | 958.4327      | 0 ± 0 %   | 958.2374      | 0 ± 0 %   | 958.8433      | 1 ± 1 %   |
| 33 | 1261-1285 | CEGDINECLSNPCSSSEGLDCVQLK                    | 1012.0873 | 3+ | Glc            | 1012.376<br>9 | 0 ± 0 %   | ND            | 0 ± 0 %   | 1012.546<br>9 | 0 ± 1 %   |
| 33 | 1261-1285 | CEGDINECLSNPCSSSEGLDCVQLK                    | 1056.1014 | 3+ | Xyl-Glc        | 1056.187<br>2 | 61 ± 3 %  | 1056.449<br>8 | 8 ± 1 %   | 1056.763<br>4 | 99 ± 1 %  |
| 33 | 1261-1285 | CEGDINECLSNPCSSSEGLDCVQLK                    | 1100.1155 | 3+ | Xyl-Xyl-Glc    | 1100.186<br>6 | 39 ± 3 %  | 1100.379<br>9 | 0 ± 1 %   | 1100.287<br>1 | 0 ± 0 %   |
| 33 | 1176-1205 | HGSDCSEEINECLSQPCQNGGTCIDLTSY                | 1066.1049 | 3+ | Hex-Glc        | ND            | 0 ± 0 %   | 1066.105<br>9 | 82 ± 6 %  | ND            | 0 ± 0 %   |
| 33 | 1176-1205 | HGSDCSEEINECLSQPCQNGGTCIDLTSY                | 1163.1367 | 3+ | Neu5Ac-Hex-Glc | ND            | 0 ± 0 %   | 1163.783<br>4 | 10 ± 6 %  | ND            | 0 ± 0 %   |

|    |           |                       |           |    |             |               |           |               |          |          |          |
|----|-----------|-----------------------|-----------|----|-------------|---------------|-----------|---------------|----------|----------|----------|
| 36 | 1373-1393 | DCESGCASNPCQHGGTCYPQR | 863.3297  | 3+ | naked       | 863.6824      | 2 ± 1 %   | 863.4876      | 3 ± 2 %  | 863.9731 | 3 ± 1 %  |
| 36 | 1373-1393 | DCESGCASNPCQHGGTCYPQR | 917.3473  | 3+ | Glc         | 917.9186      | 66 ± 10 % | 917.2323      | 97 ± 2 % | 917.2111 | 58 ± 5 % |
| 36 | 1373-1393 | DCESGCASNPCQHGGTCYPQR | 961.3614  | 3+ | Xyl-Glc     | 961.2832      | 0 ± 1 %   | 961.7351      | 0 ± 0 %  | 961.4577 | 39 ± 6 % |
| 36 | 1373-1393 | DCESGCASNPCQHGGTCYPQR | 1005.3755 | 3+ | Xyl-Xyl-Glc | 1005.473<br>3 | 30 ± 10 % | 1005.832<br>2 | 0 ± 0 %  | ND       | 0 ± 0 %  |

**Table S3. Summary of mass spectral semi-quantification of NOTCH1 O-fucose glycans.** The number of EGF repeats, the number of amino acids counted from the N-terminal, the peptide sequences, predicted mass (m/z), charge state, glycoform, measured mass (m/z), and glycoform ratio of the analyzed peptides are shown. In the glycoform ratio column, the average height of EICs and the standard error of the mean are shown (N=3). Colored letters in sequences indicate post-translational modification sites. Red, O-Fuc.

|     |           |                                                        |                      |              |           | WT                  |                 | GXYLT1/2 DKO        |                 | XXYLT1 KO           |                 |
|-----|-----------|--------------------------------------------------------|----------------------|--------------|-----------|---------------------|-----------------|---------------------|-----------------|---------------------|-----------------|
| EGF | A.A.      | Sequence                                               | Predicted mass (m/z) | charge state | Glycoform | measured mass (m/z) | Glycoform Ratio | measured mass (m/z) | Glycoform Ratio | measured mass (m/z) | Glycoform Ratio |
| 2   | 113-126   | NGG <b>T</b> CDLLTLTEYK                                | 792.8829             | 2+           | naked     | 792.6573            | 1 ± 0 %         | 793.0288            | 1 ± 0 %         | 792.1849            | 1 ± 0 %         |
| 2   | 113-126   | NGG <b>T</b> CDLLTLTEYK                                | 865.9118             | 2+           | Fuc       | 865.7168            | 99 ± 0 %        | 865.9923            | 99 ± 1 %        | 866.4625            | 99 ± 0 %        |
| 6   | 208-234   | ATHTGPHCELPYVPCSPSPCQNGG <b>T</b> CR                   | 760.8289             | 4+           | naked     | 760.9859            | 2 ± 1 %         | 760.1754            | 7 ± 2 %         | 760.4492            | 5 ± 1 %         |
| 6   | 208-234   | ATHTGPHCELPYVPCSPSPCQNGG <b>T</b> CR                   | 797.3434             | 4+           | Fuc       | 797.5814            | 98 ± 1 %        | 797.0067            | 93 ± 2 %        | 797.5836            | 95 ± 1 %        |
| 36  | 1369-1413 | SPTCLCLGSFTGPECQFPASSPCVGSNPCYNQG <b>T</b> CEPTSENPFYR | 1371.5691            | 4+           | naked     | 1371.2829           | 1 ± 1 %         | 1371.5901           | 0 ± 0 %         | 1371.2299           | 0 ± 0 %         |
| 36  | 1369-1413 | SPTCLCLGSFTGPECQFPASSPCVGSNPCYNQG <b>T</b> CEPTSENPFYR | 1408.0836            | 4+           | Fuc       | 1408.3744           | 99 ± 1 %        | 1407.6376           | 100 ± 0 %       | 1408.1857           | 100 ± 0 %       |

**Table S4. Summary of mass spectral semi-quantification of NOTCH1 O-GlcNAc glycans.** The number of EGF repeats, the number of amino acids counted from the N-terminal, the peptide sequences, predicted mass (m/z), charge state, glycoform, measured mass (m/z), and glycoform ratio of the analyzed peptides are shown. In the glycoform ratio column, the average height of EICs and the standard error of the mean are shown (N=3). Colored letters in sequences indicate post-translational modification sites. Blue, O-Glc; red, O-Fuc; green, O-GlcNAc.

| EGF | A.A.    | Sequence                                                      | Predicted mass (m/z) | charge state | Glycoform         | WT                  |                 | GXYLT1/2 DKO        |                 | XXYLT1 KO           |                 |
|-----|---------|---------------------------------------------------------------|----------------------|--------------|-------------------|---------------------|-----------------|---------------------|-----------------|---------------------|-----------------|
|     |         |                                                               |                      |              |                   | measured mass (m/z) | Glycoform Ratio | measured mass (m/z) | Glycoform Ratio | measured mass (m/z) | Glycoform Ratio |
| 2   | 70-112  | NAG <b>T</b> CHVVDHGGTVDYACSCPLGF <b>SG</b> PLCLTPLDNACLANPCR | 1213.5366            | 4+           | naked             | 1213.4516           | 71 ± 6 %        | 1213.8911           | 77 ± 3 %        | 1213.1087           | 70 ± 6 %        |
| 2   | 70-112  | NAG <b>T</b> CHVVDHGGTVDYACSCPLGF <b>SG</b> PLCLTPLDNACLANPCR | 1264.3064            | 4+           | GlcNAc            | 1264.4866           | 3 ± 1 %         | 1264.3458           | 2 ± 1 %         | 1264.7924           | 2 ± 1 %         |
| 2   | 70-112  | NAG <b>T</b> CHVVDHGGTVDYACSCPLGF <b>SG</b> PLCLTPLDNACLANPCR | 1304.8196            | 4+           | Gal-GlcNAc        | 1304.5226           | 9 ± 1 %         | 1304.9345           | 6 ± 1 %         | 1304.0083           | 5 ± 1 %         |
| 2   | 70-112  | NAG <b>T</b> CHVVDHGGTVDYACSCPLGF <b>SG</b> PLCLTPLDNACLANPCR | 1377.5935            | 4+           | Neu5Ac-Gal-GlcNAc | 1377.4379           | 17 ± 3 %        | 1377.7476           | 14 ± 2 %        | 1377.9954           | 23 ± 5 %        |
| 10  | 396-428 | AICTCP <b>SGY</b> TGPACSQDVDECALGANPCEHAGK                    | 1185.4912            | 3+           | naked             | 1185.6047           | 91 ± 0 %        | 1185.6248           | 100 ± 0 %       | 1185.2671           | 99 ± 0 %        |
| 10  | 396-428 | AICTCP <b>SGY</b> TGPACSQDVDECALGANPCEHAGK                    | 1253.1843            | 3+           | GlcNAc            | 1253.4771           | 8 ± 0 %         | 1253.4558           | 0 ± 0 %         | 1254.1621           | 0 ± 0 %         |
| 10  | 396-428 | AICTCP <b>SGY</b> TGPACSQDVDECALGANPCEHAGK                    | 1307.2019            | 3+           | Gal-GlcNAc        | 1307.3298           | 0 ± 0 %         | ND                  | 0 ± 0 %         | 1307.6729           | 1 ± 0 %         |
| 10  | 396-428 | AICTCP <b>SGY</b> TGPACSQDVDECALGANPCEHAGK                    | 1404.2337            | 3+           | Neu5Ac-Gal-GlcNAc | 1404.5557           | 0 ± 0 %         | 1403.9883           | 0 ± 0 %         | ND                  | 0 ± 0 %         |
| 20  | 781-814 | EGF <b>SG</b> PNCQTNINECA <b>S</b> NPCLNQ <b>GT</b> CIDDVAGYK | 1091.7014            | 4+           | naked             | 1091.8113           | 17 ± 1 %        | 1091.4195           | 17 ± 3 %        | 1092.0195           | 24 ± 9 %        |
| 20  | 781-814 | EGF <b>SG</b> PNCQTNINECA <b>S</b> NPCLNQ <b>GT</b> CIDDVAGYK | 1142.4713            | 4+           | GlcNAc            | 1142.7856           | 2 ± 1 %         | 1142.9897           | 10 ± 1 %        | 1142.8822           | 9 ± 6 %         |
| 20  | 781-814 | EGF <b>SG</b> PNCQTNINECA <b>S</b> NPCLNQ <b>GT</b> CIDDVAGYK | 1182.9845            | 4+           | Gal-GlcNAc        | 1183.0492           | 64 ± 2 %        | 1182.3814           | 58 ± 7 %        | 1182.3569           | 51 ± 5 %        |
| 20  | 781-814 | EGF <b>SG</b> PNCQTNINECA <b>S</b> NPCLNQ <b>GT</b> CIDDVAGYK | 1255.7584            | 4+           | Neu5Ac-Gal-GlcNAc | 1255.3632           | 16 ± 1 %        | 1255.6902           | 15 ± 4 %        | 1255.4821           | 16 ± 2 %        |
